# Supplementary material
Source: MDPI journal article supplement (https://www.mdpi.com/2072-4292/13/21/4316)
Supplement: s1 [file s1]

Archive with 3 entries (3 files):
- Flowchart.pptx
- remotesensing-1411361-supple.pdf
- Stations.html
