# Supplementary material
Source: MDPI journal article supplement (https://www.mdpi.com/2072-4292/13/21/4316)
Supplement: s1 [file s1 › remotesensing-1411361-supple.pdf]

Supplementary figures

# Evapotranspiration Changes over the European Alps: Consistency of Trends and Their Drivers between the MOD16 and SSEBop Algorithms

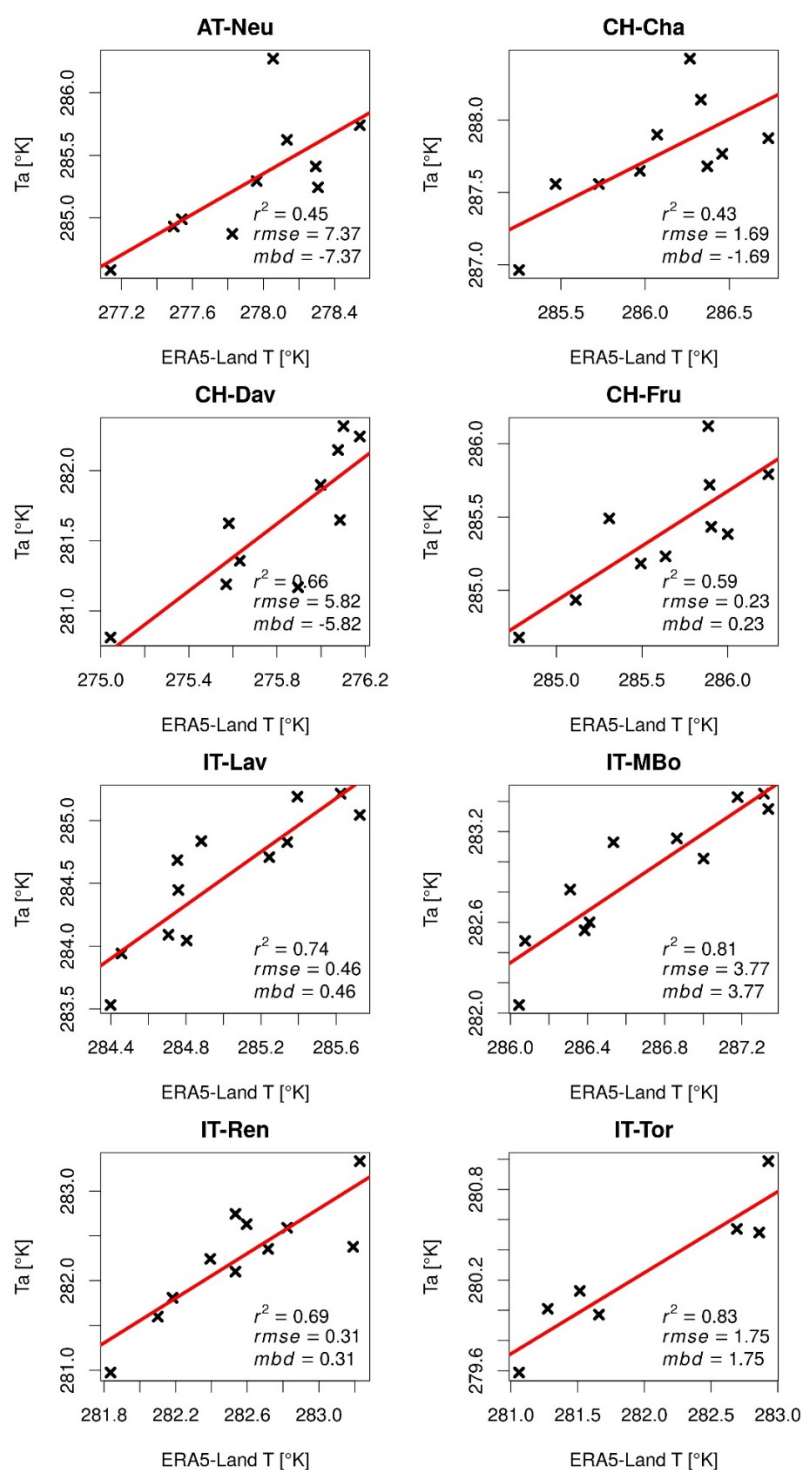

**Figure S1.** Correlation between growing season average air temperature measured at eddy flux towers sites and extracted from ERA5 Land reanalysis at the location of the tower sites.

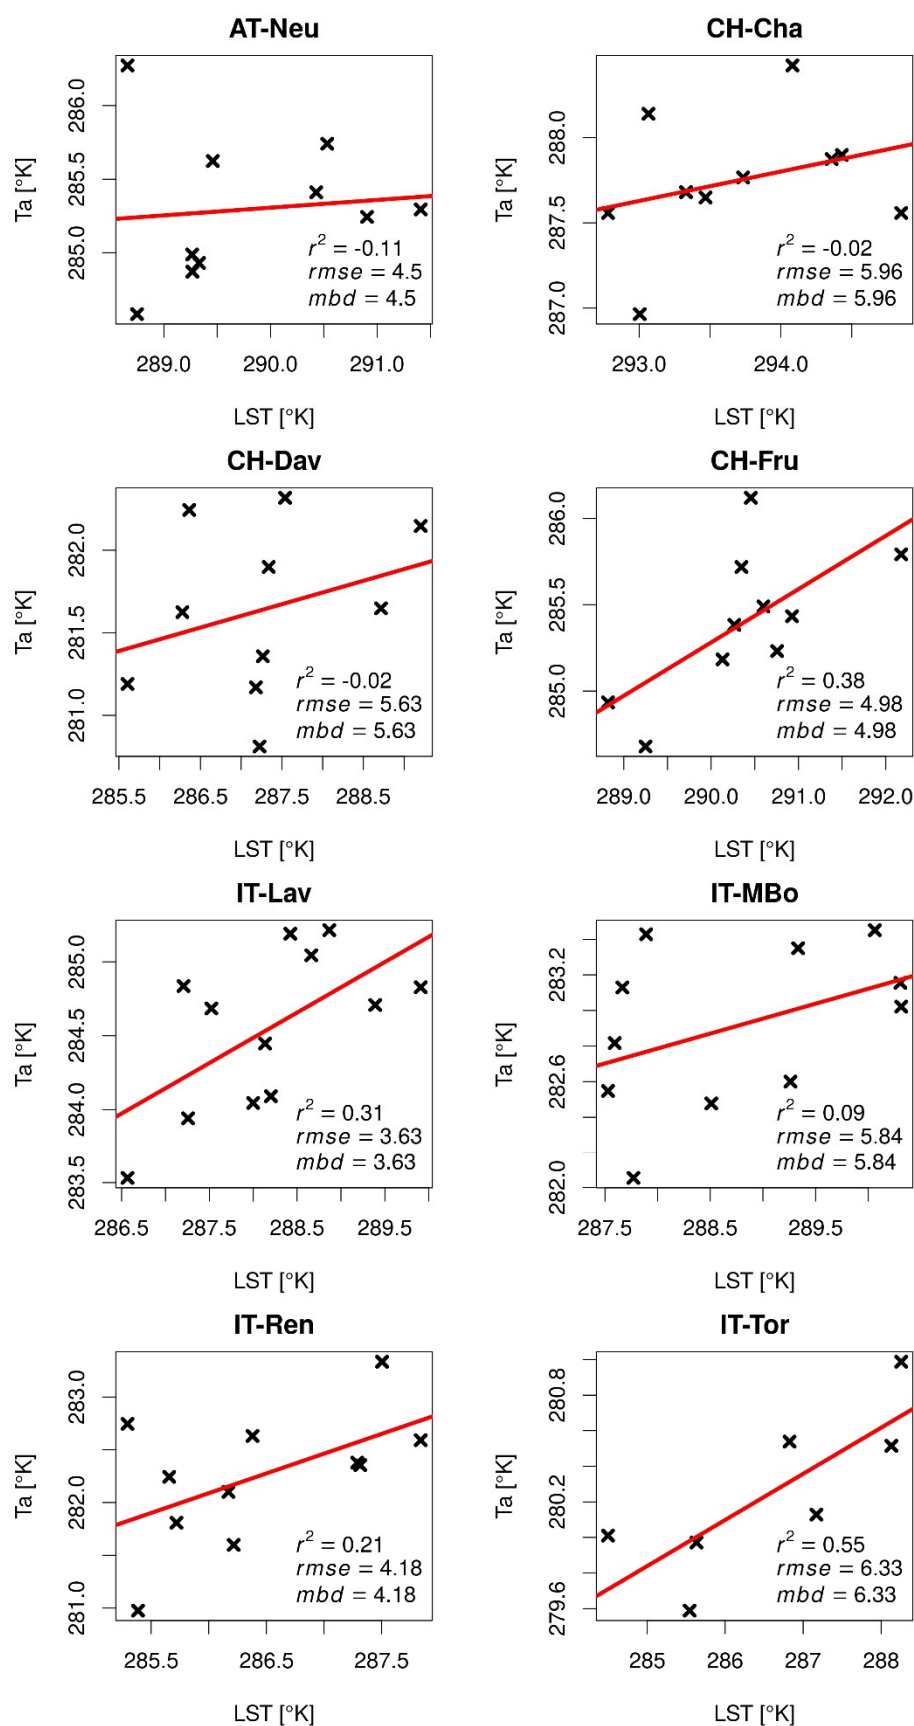

**Figure S2.** Correlation between growing season average air temperature measured at eddy flux towers sites and growing season average LST extracted from the MOD11 product at the location of the tower sites.

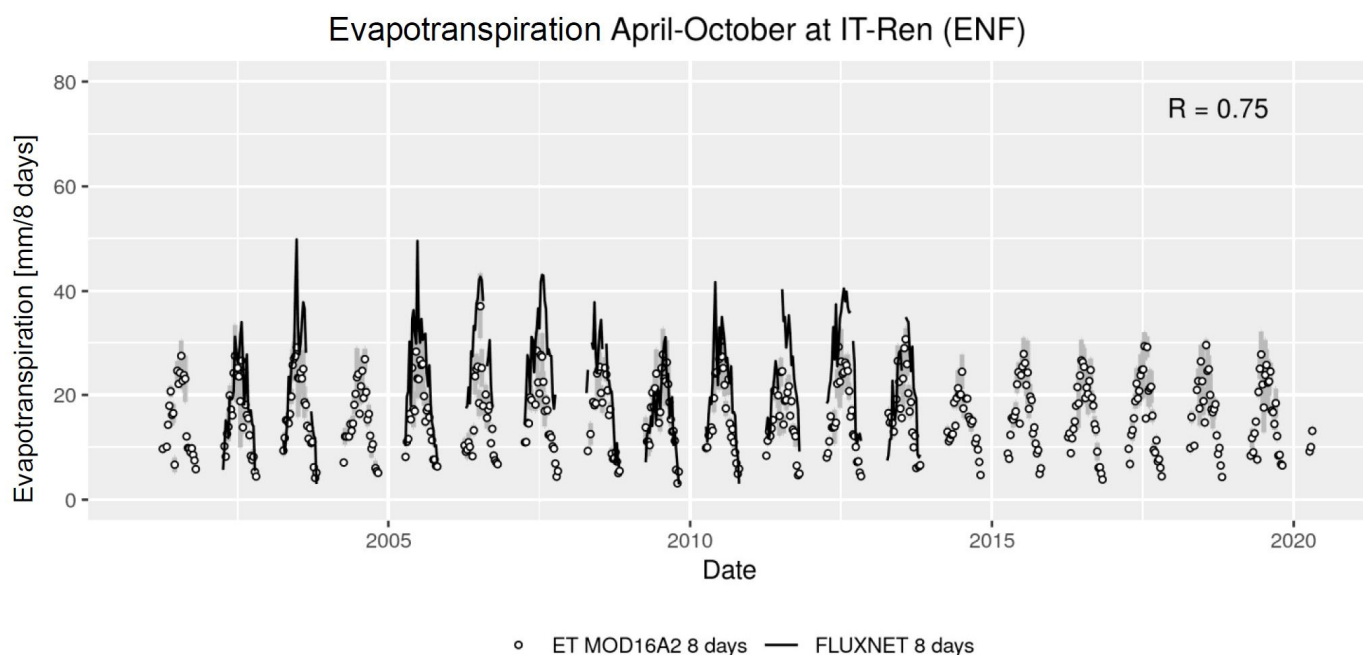

**Figure S3.** Timeseries of ET from eddy covariance measurements and from the MOD16 product at the Fluxnet site IT-Ren.

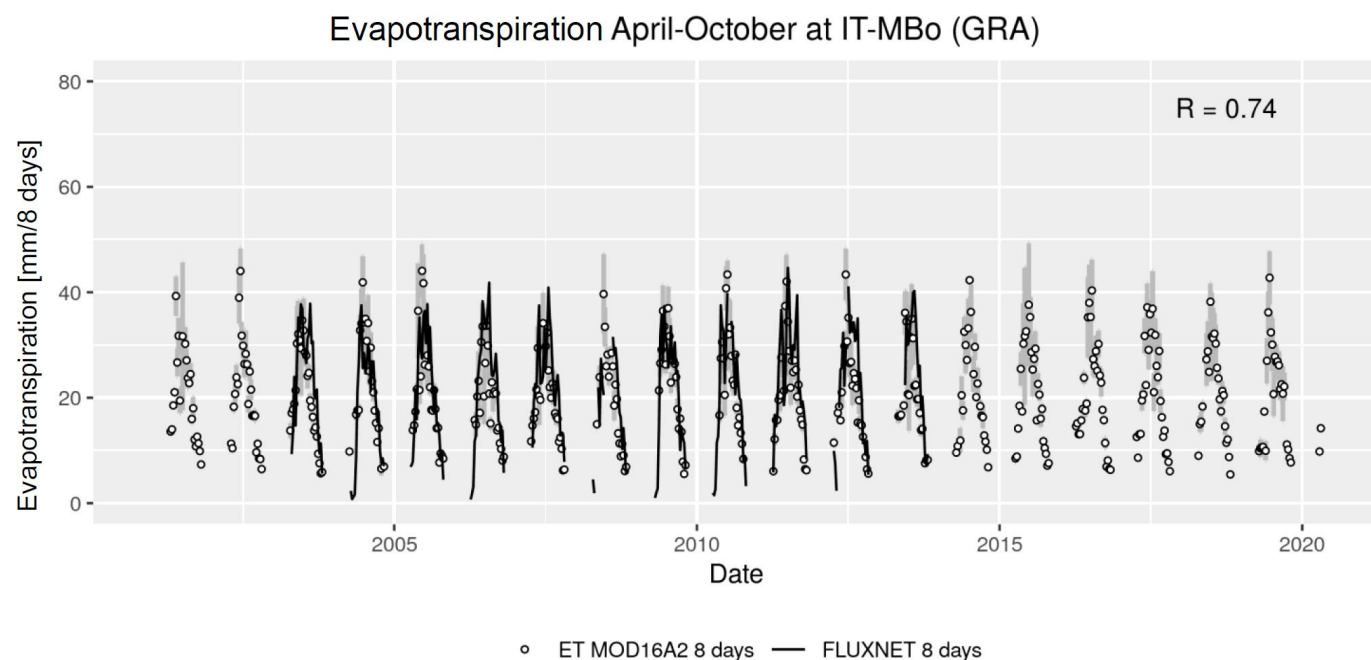

**Figure S4.** Timeseries of ET from eddy covariance measurements and from the MOD16 product at the Fluxnet site IT-MBo.

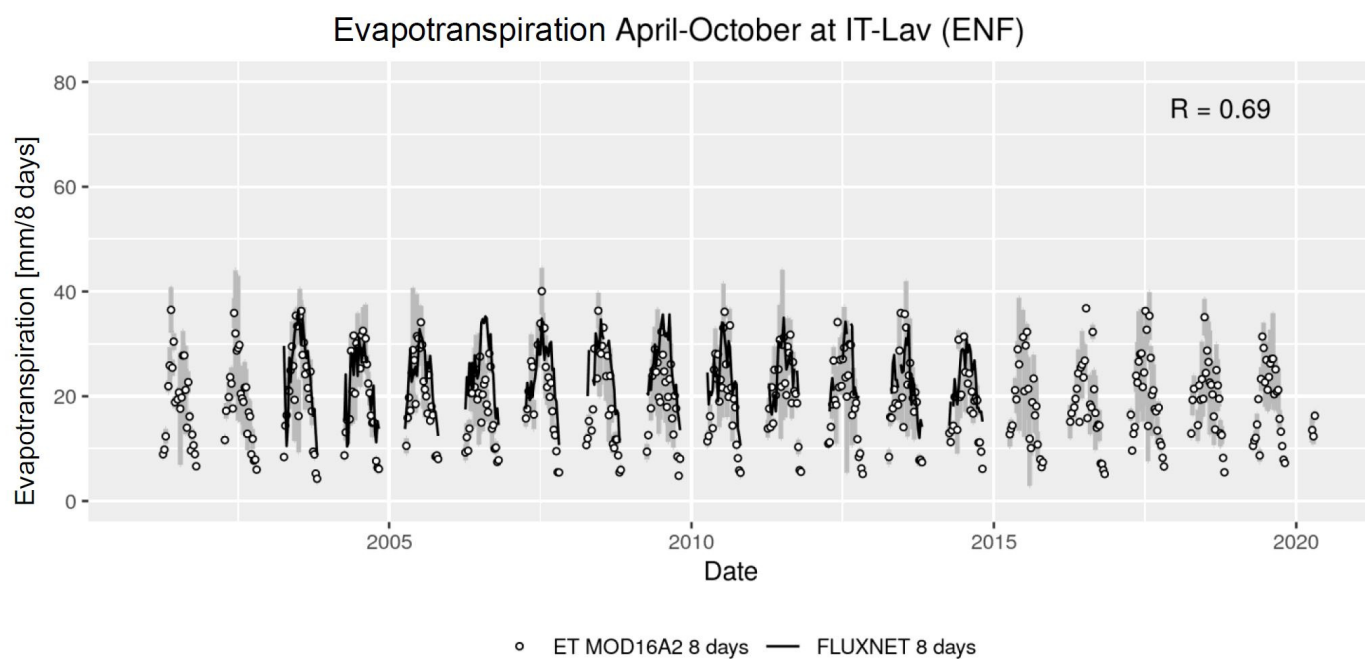

**Figure S5.** Timeseries of ET from eddy covariance measurements and from the MOD16 product at the Fluxnet site IT-LAV.

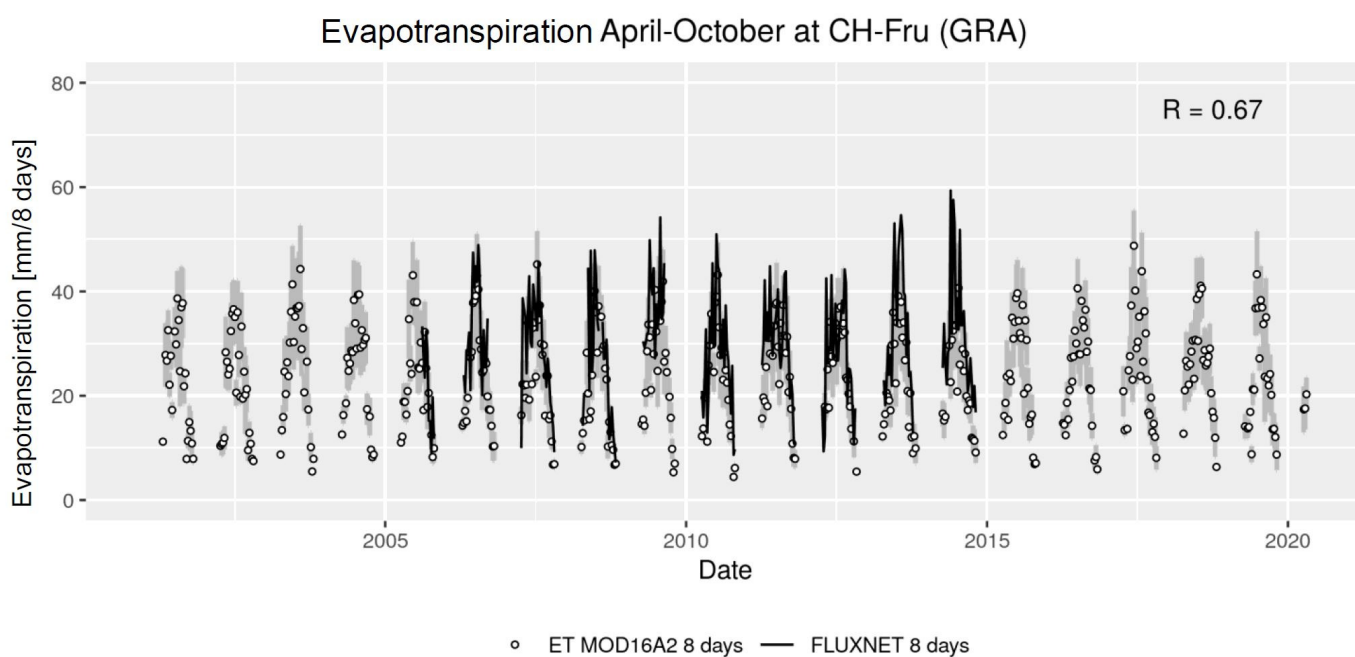

**Figure S6.** Timeseries of ET from eddy covariance measurements and from the MOD16 product at the Fluxnet site CH-Fru.

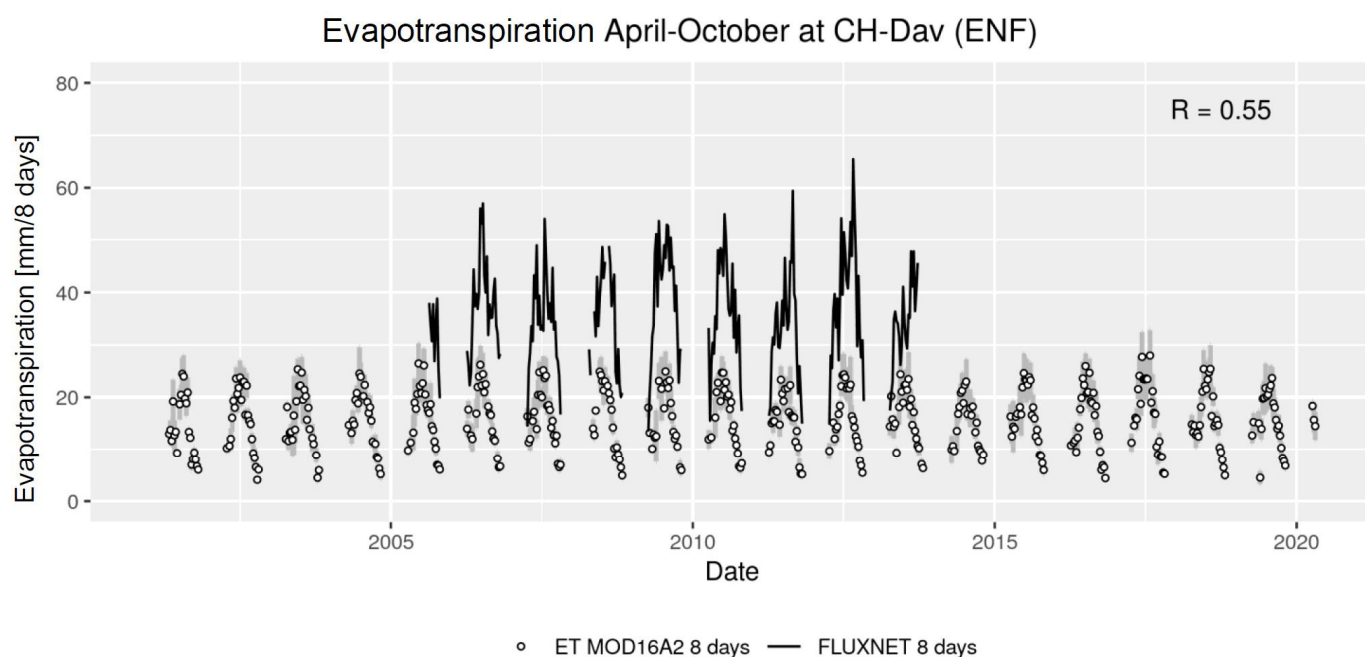

**Figure S7.** Timeseries of ET from eddy covariance measurements and from the MOD16 product at the Fluxnet site CH\_Dav.

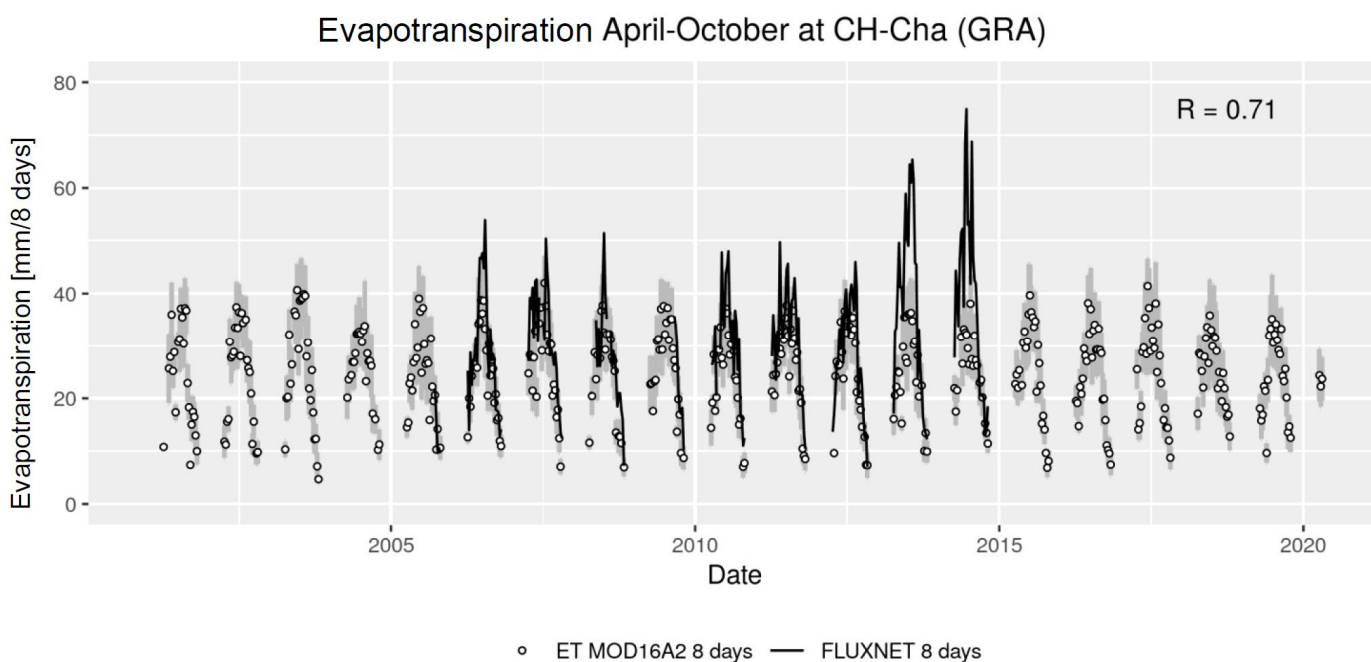

**Figure S8.** Timeseries of ET from eddy covariance measurements and from the MOD16 product at the Fluxnet site CH\_Cha.

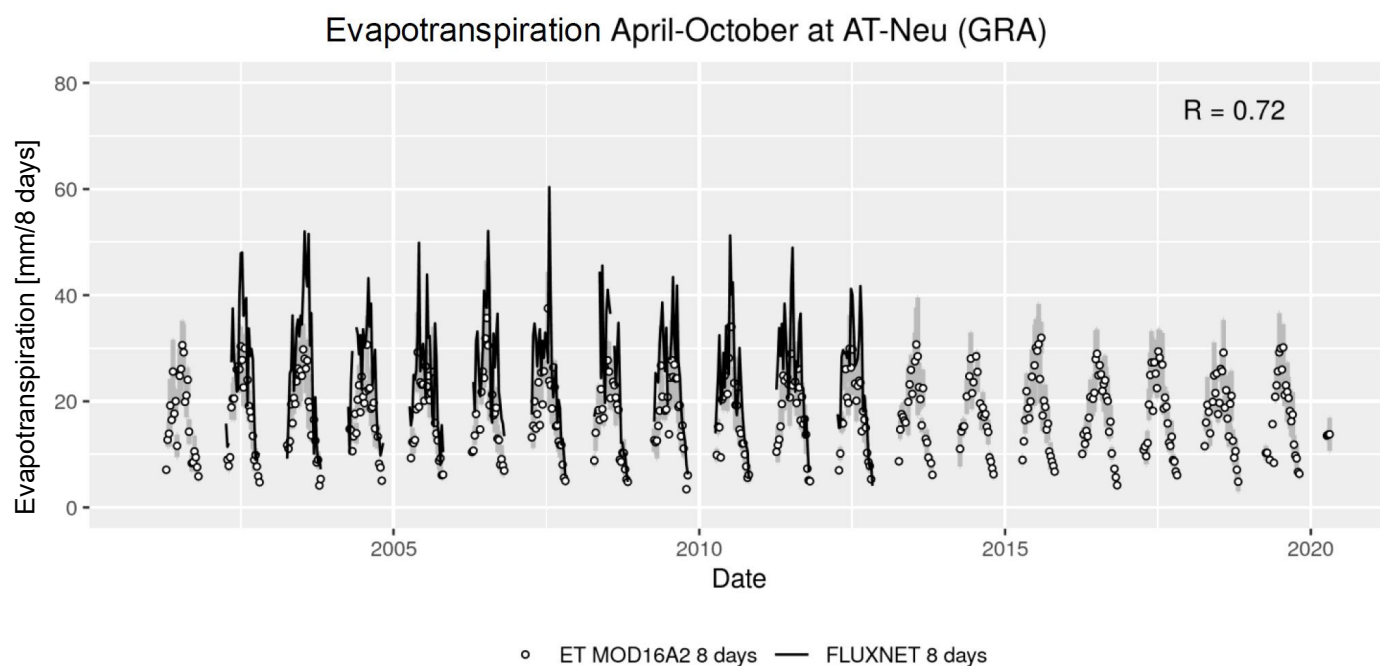

**Figure S9.** Timeseries of ET from eddy covariance measurements and from the MOD16 product at the Fluxnet site AT\_Neu.

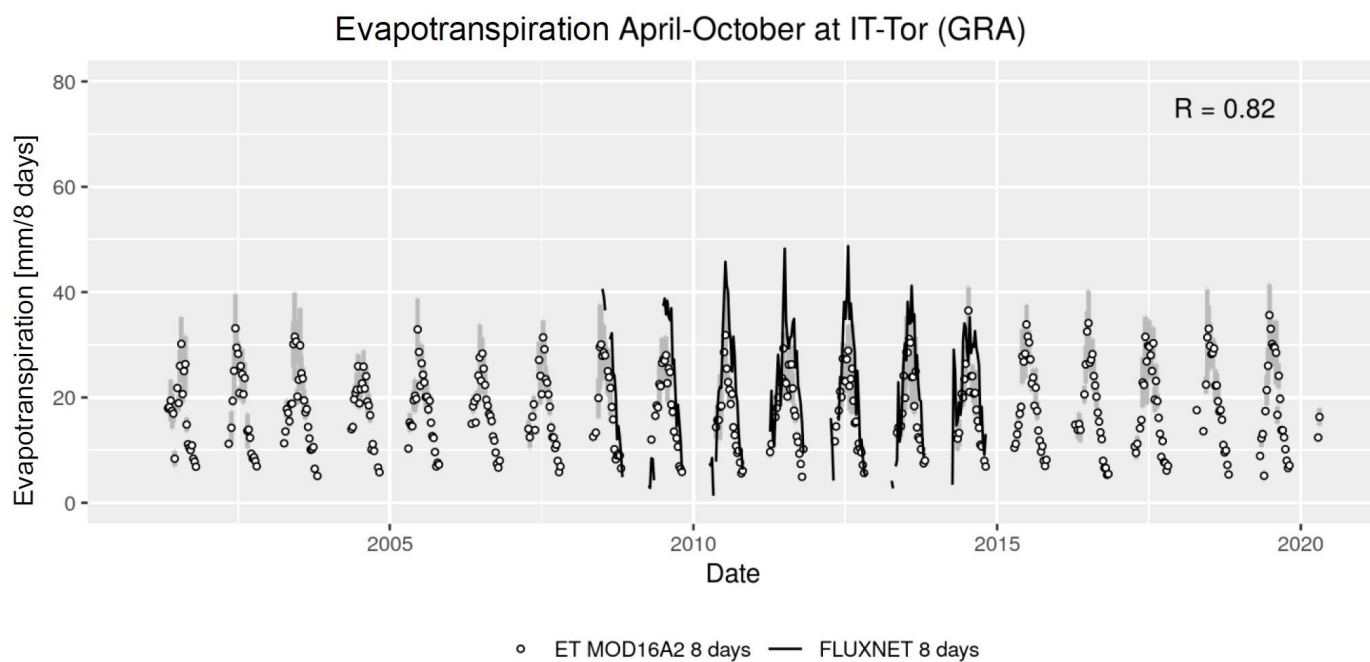

**Figure S10.** Timeseries of ET from eddy covariance measurements and from the MOD16 product at the Fluxnet site IT-Tor.

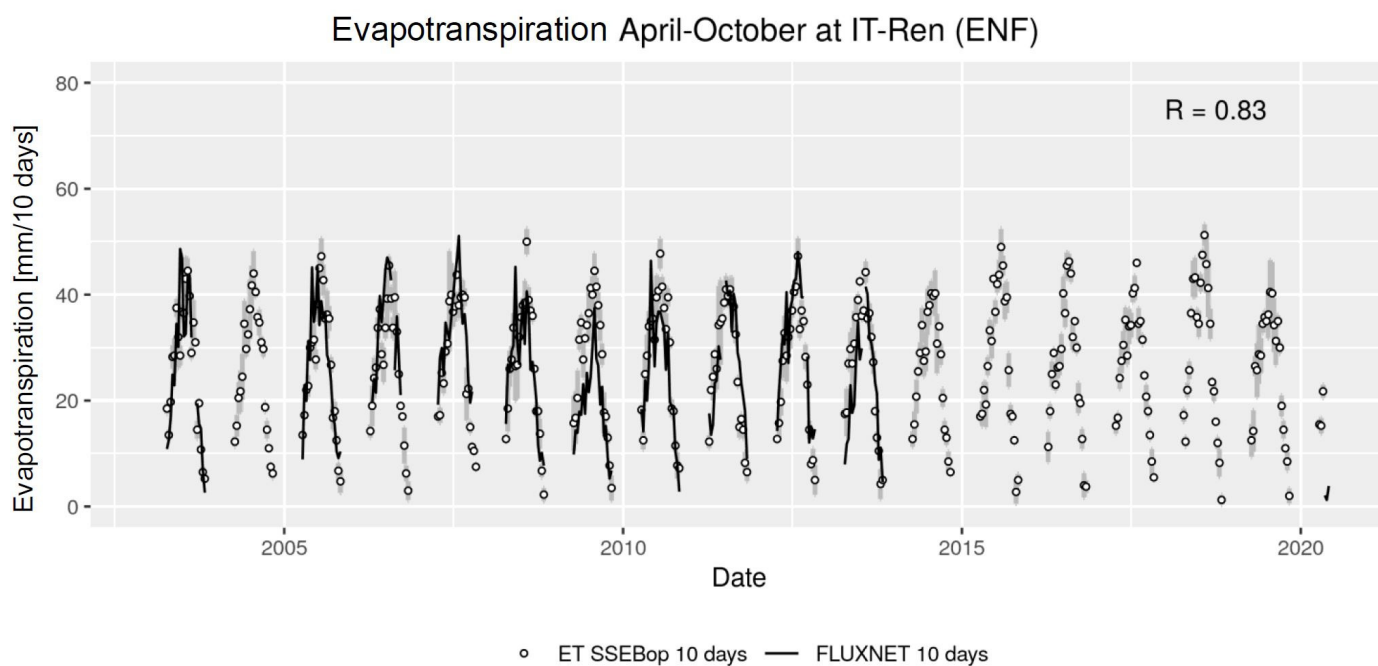

**Figure S11.** Timeseries of ET from eddy covariance measurements and from the SSEBop product at the Fluxnet site IT-Ren.

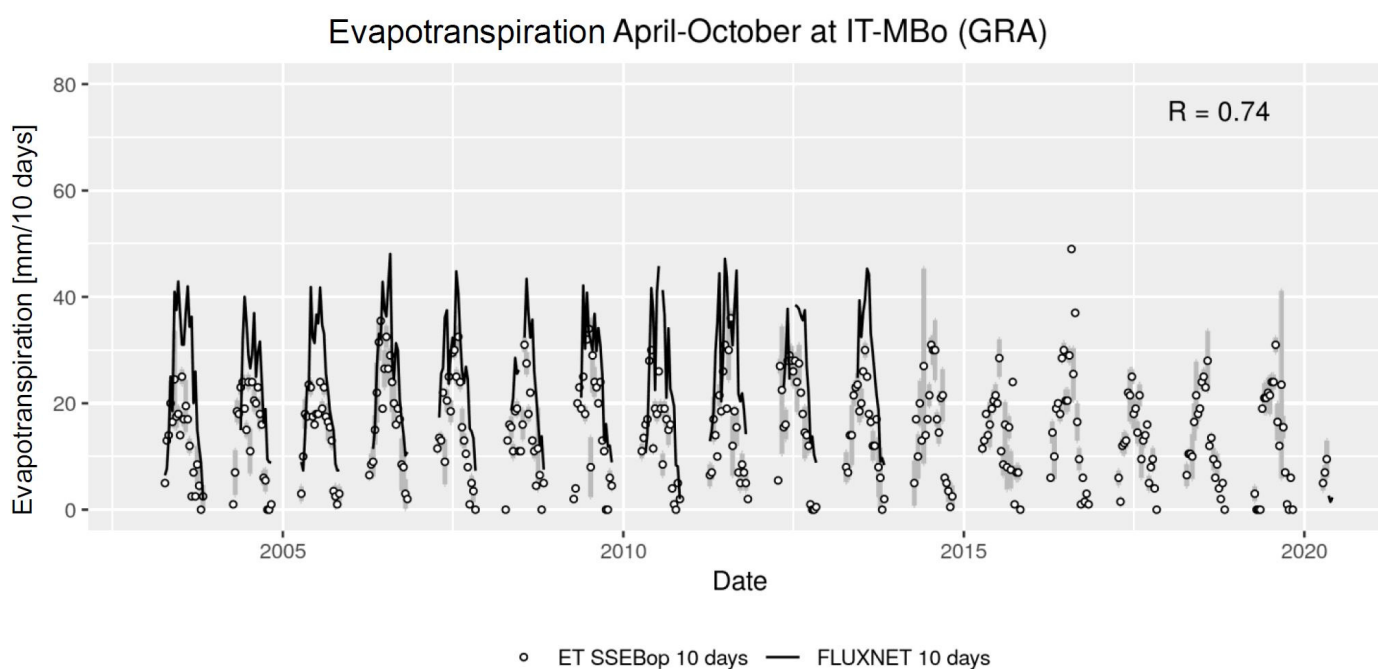

**Figure S12.** Timeseries of ET from eddy covariance measurements and from the SSEBop product at the Fluxnet site IT-MBo.

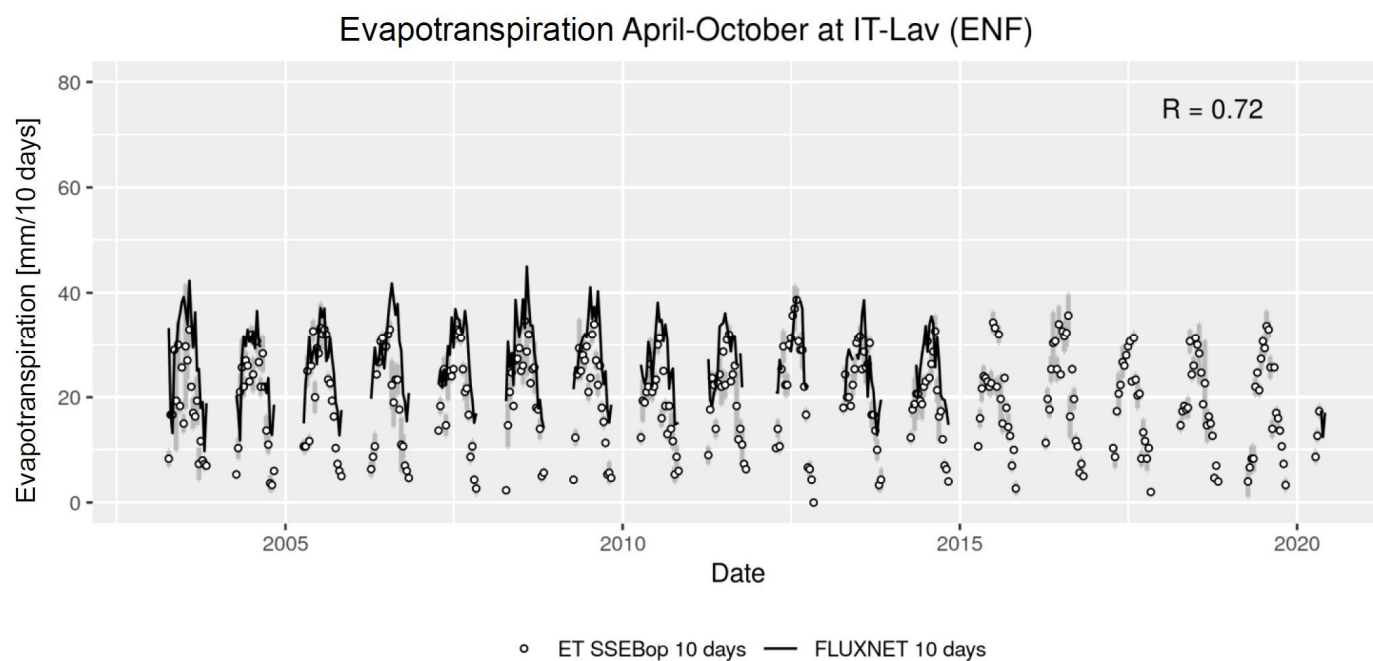

**Figure S13.** Timeseries of ET from eddy covariance measurements and from the SSEBop product at the Fluxnet site IT-Lav.

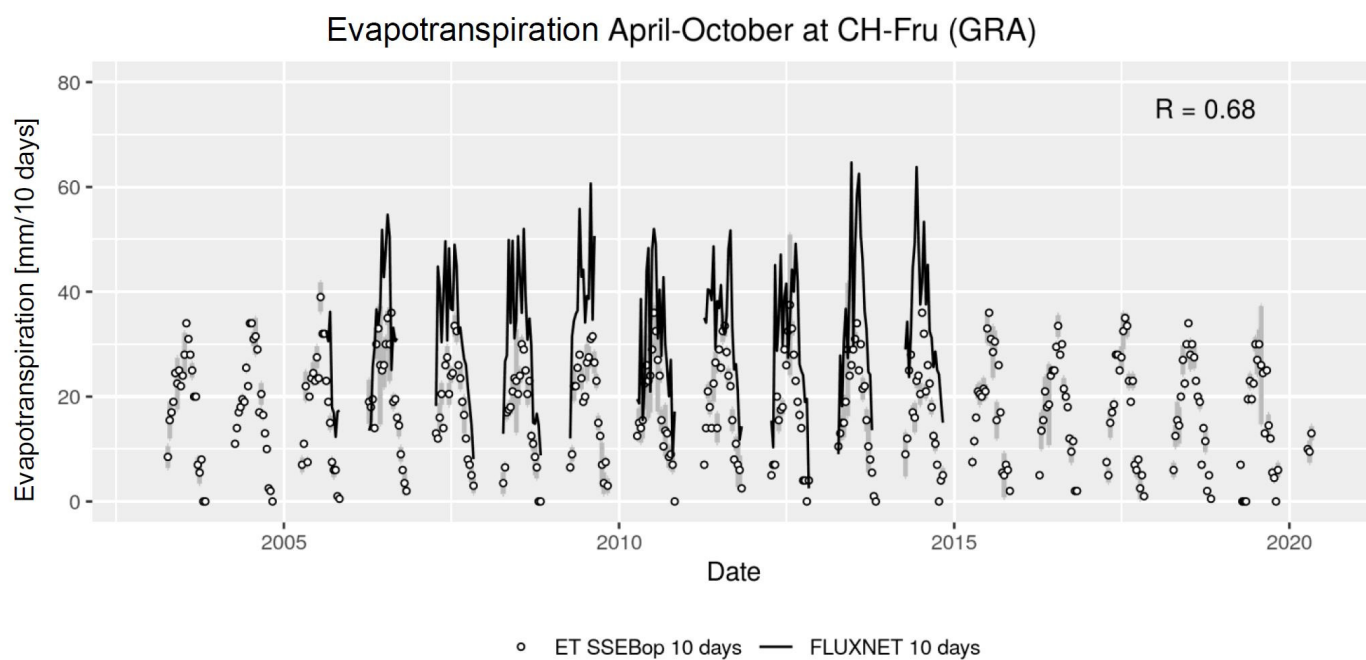

**Figure S14.** Timeseries of ET from eddy covariance measurements and from the SSEBop product at the Fluxnet site CH\_Fru.

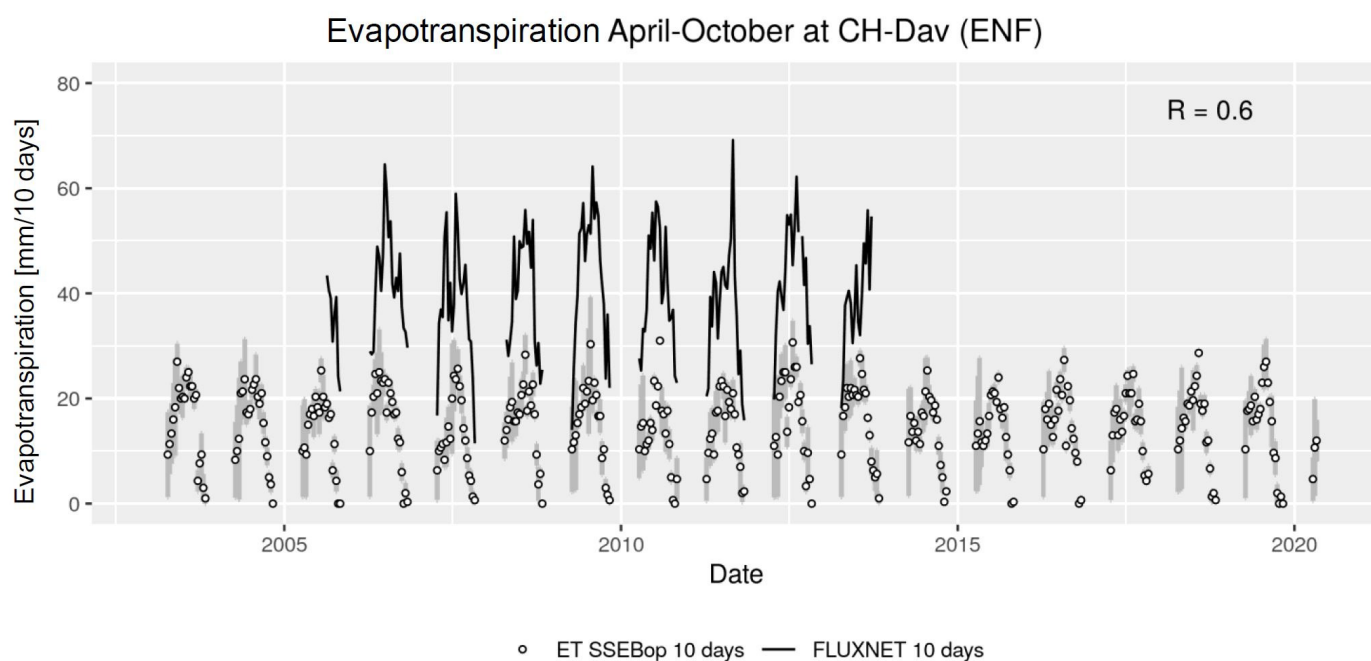

**Figure S15.** Timeseries of ET from eddy covariance measurements and from the SSEBop product at the Fluxnet site CH\_Dav.

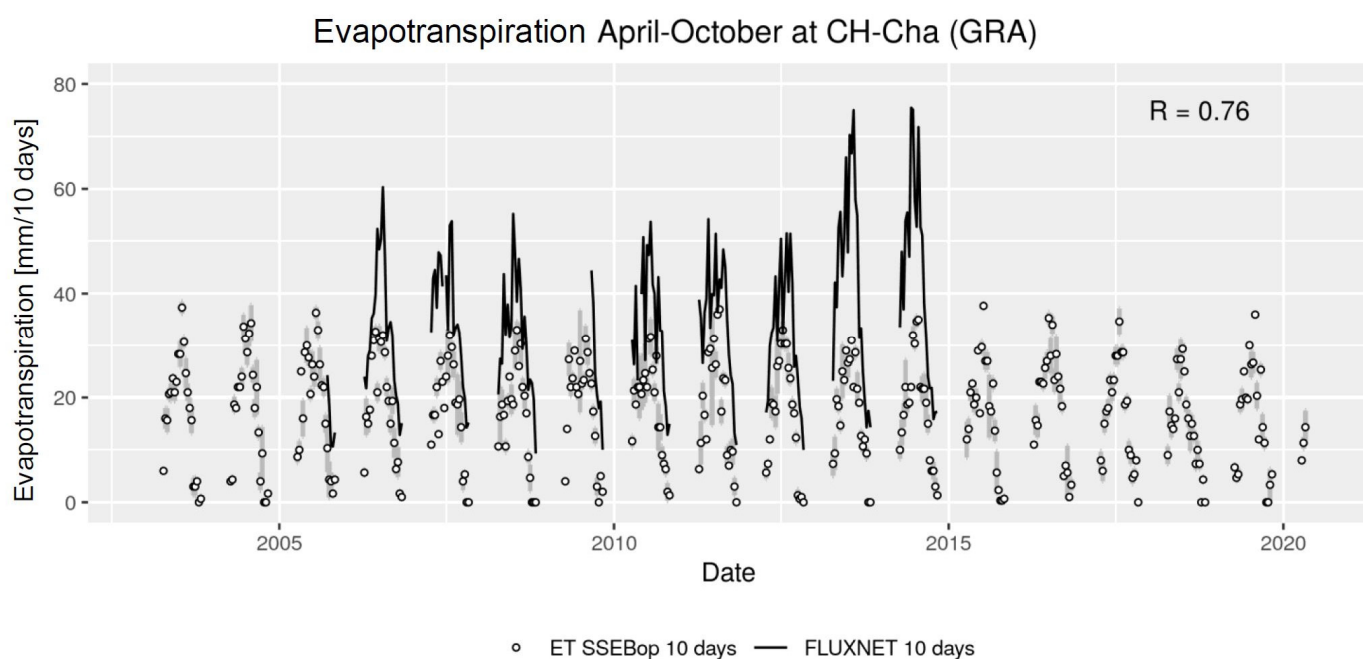

**Figure S16.** Timeseries of ET from eddy covariance measurements and from the SSEBop product at the Fluxnet site CH-Cha.

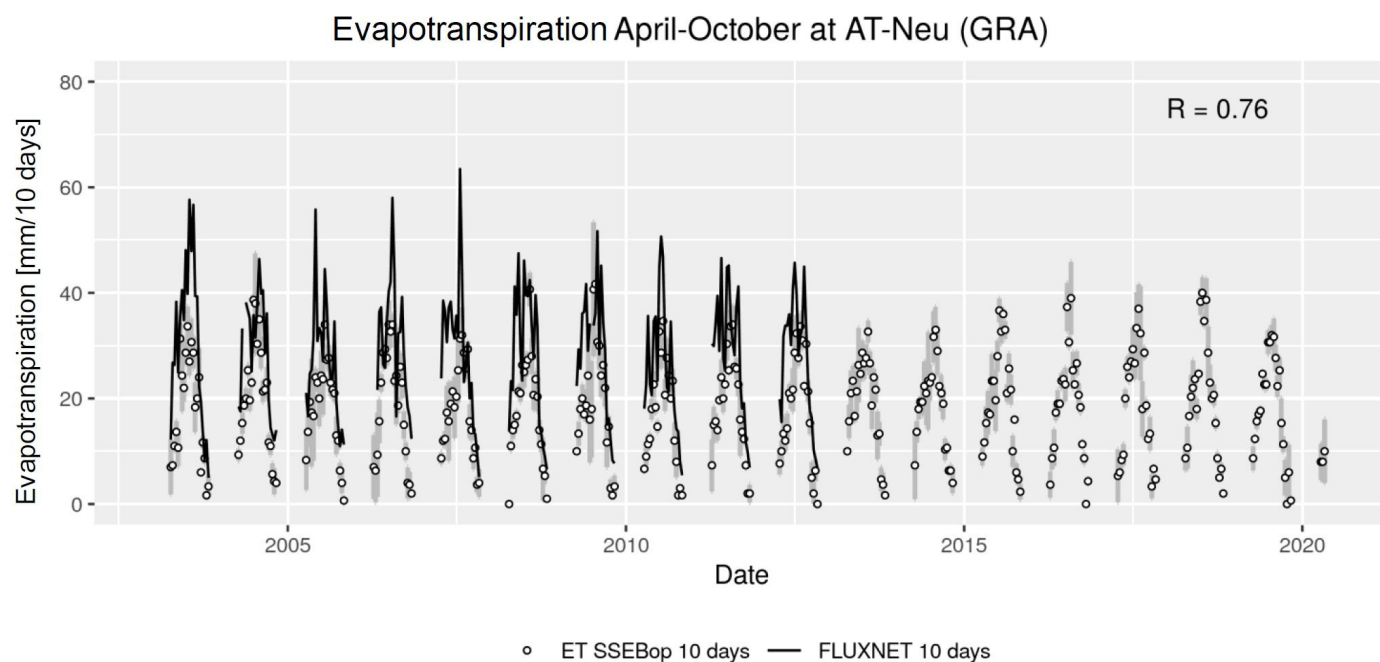

**Figure S17.** Timeseries of ET from eddy covariance measurements and from the SSEBop product at the Fluxnet site AT-Neu.

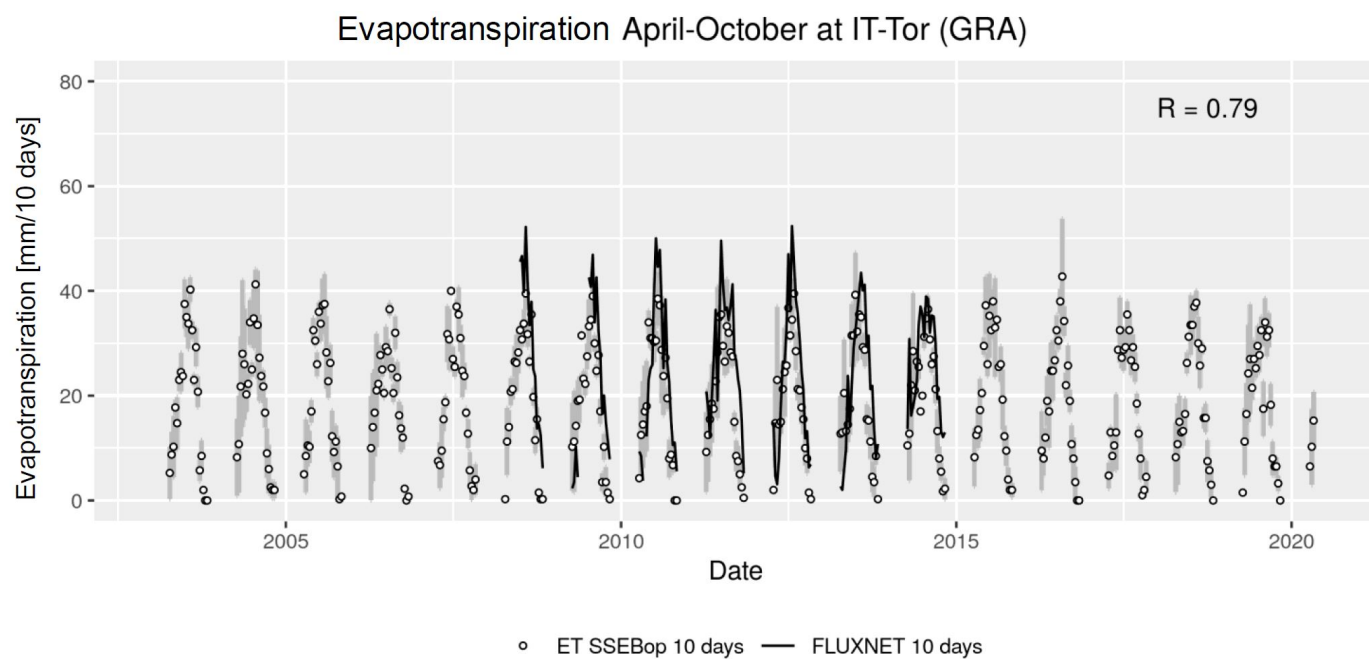

**Figure S18.** Timeseries of ET from eddy covariance measurements and from the SSEBop product at the Fluxnet site IT-Tor.

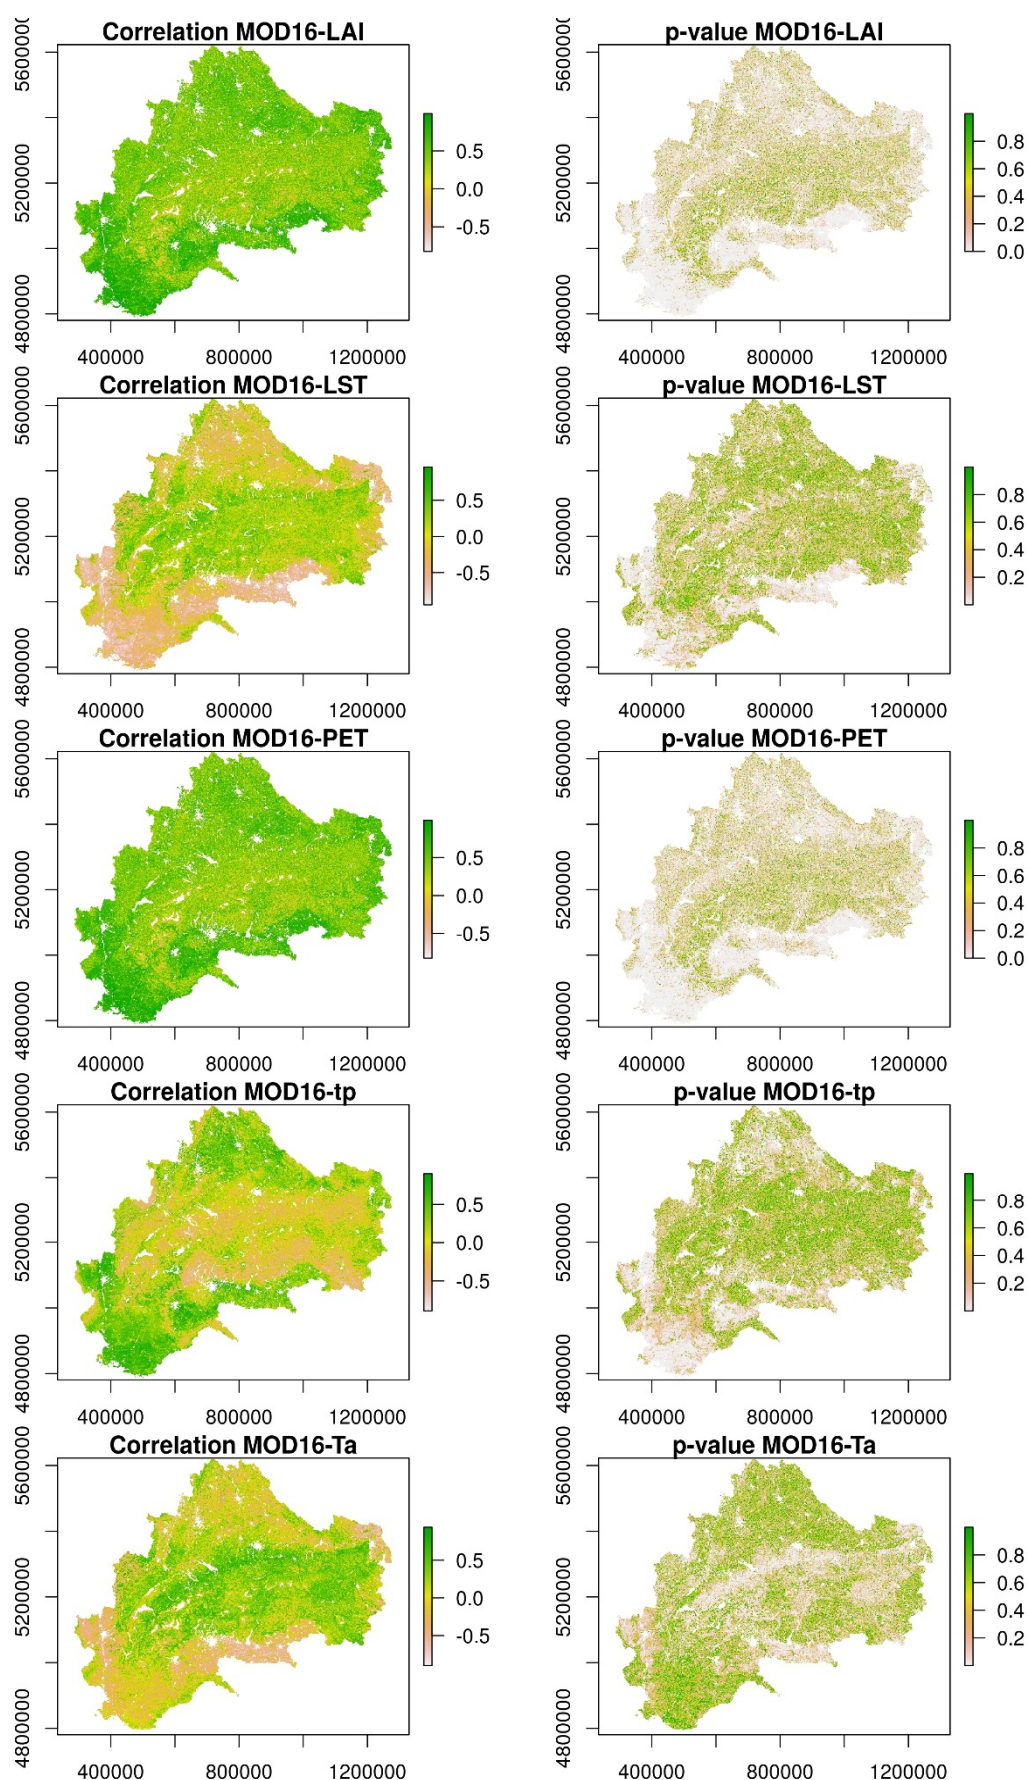

**Figure S19:** Pixel-wise correlation and  $p$ -value between MOD16 yearly total ET and LAI, LST, PET,  $tp$  and  $Ta$ . LAI (MODIS), PET (MODIS) and  $tp$  (MSWEP) were cumulated over the growing season, while  $Ta$  (ERA5-Land) and LST (MODIS) were averaged over the growing season.

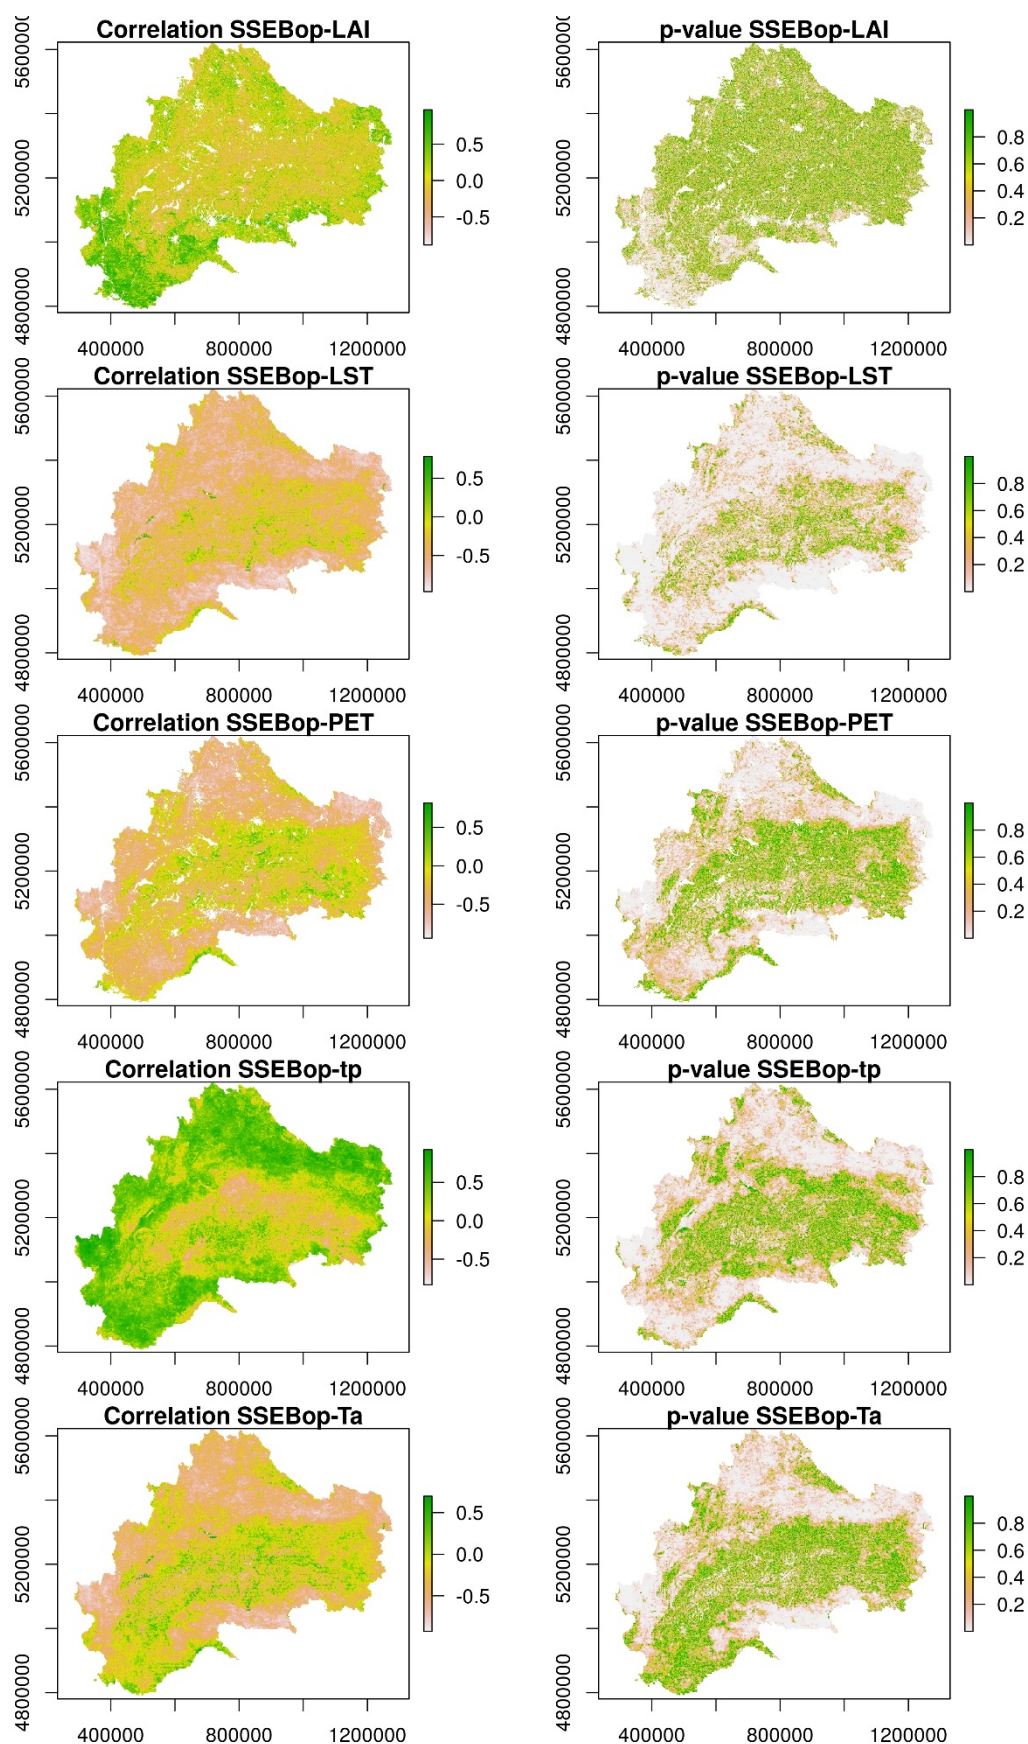

**Figure S20.** Pixel-wise correlation and  $p$ -value between SSBop yearly total ET and LAI, LST, PET,  $tp$  and  $Ta$ . LAI (MODIS), PET (MODIS) and  $tp$  (MSWEP) were cumulated over the growing season, while  $Ta$  (ERA5-Land) and LST (MODIS) were averaged over the growing season.

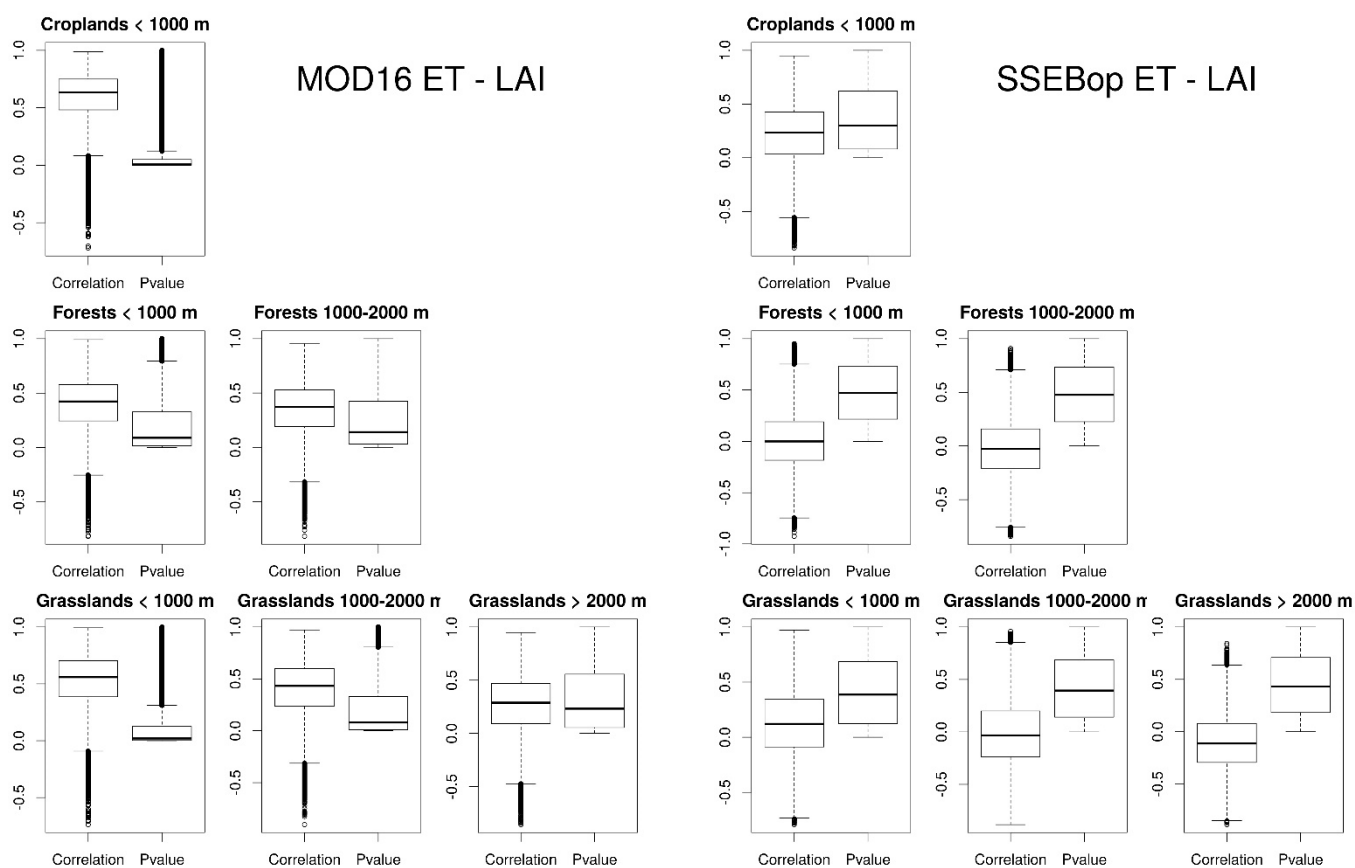

**Figure S21.** Distribution of the correlation and  $p$ -value between MOD16 and SSEBop ET and MODIS LAI. All the data were aggregated over the growing season and divided in combined classes of land cover and altitude.

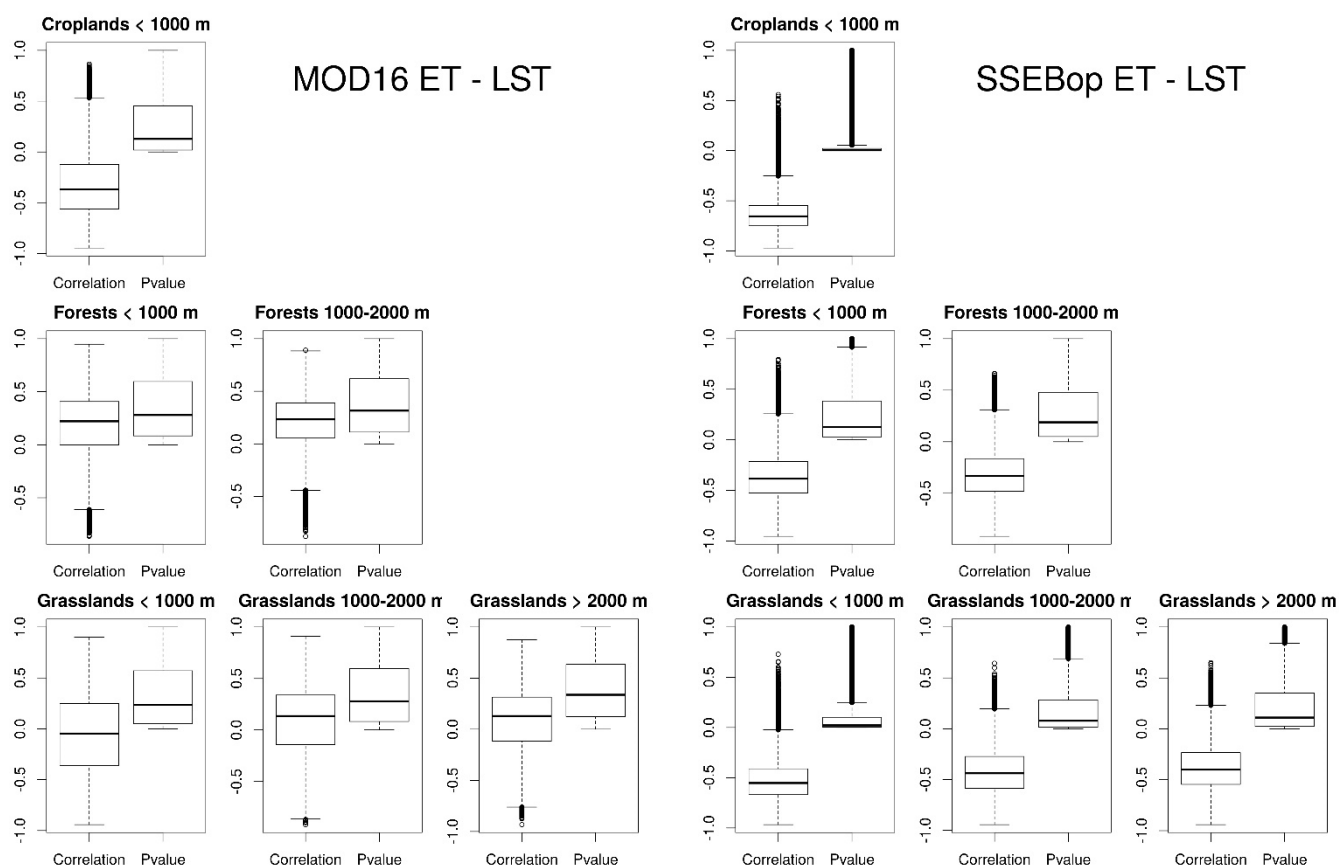

**Figure S22:** Distribution of the correlation and  $p$ -value between MOD16 and SSEBop ET and MODIS LST. All the data were aggregated over the growing season and divided in combined classes of land cover and altitude.

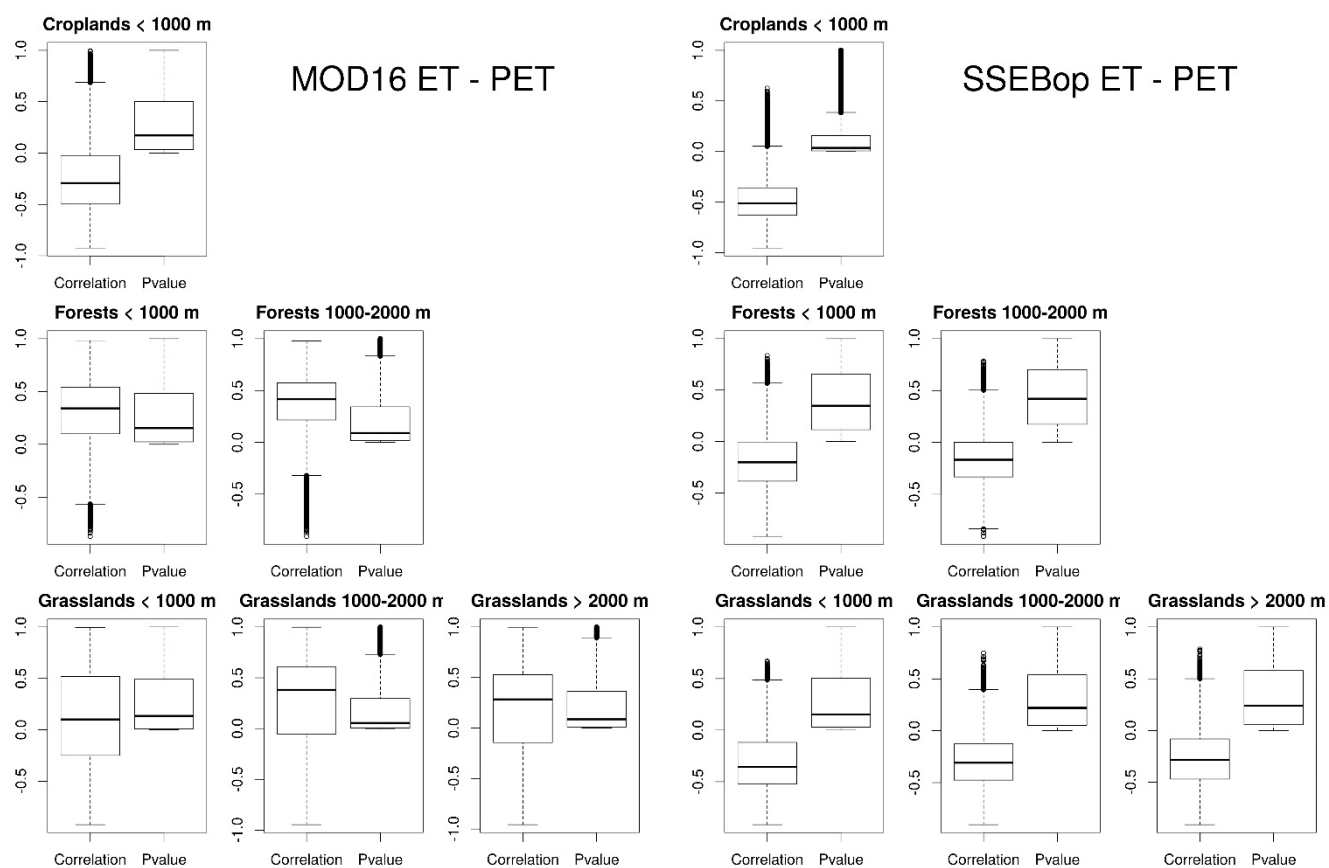

**Figure S23.** Distribution of the correlation and  $p$ -value between MOD16 and SSEBop ET and MODIS PET. All the data were aggregated over the growing season and divided in combined classes of land cover and altitude.

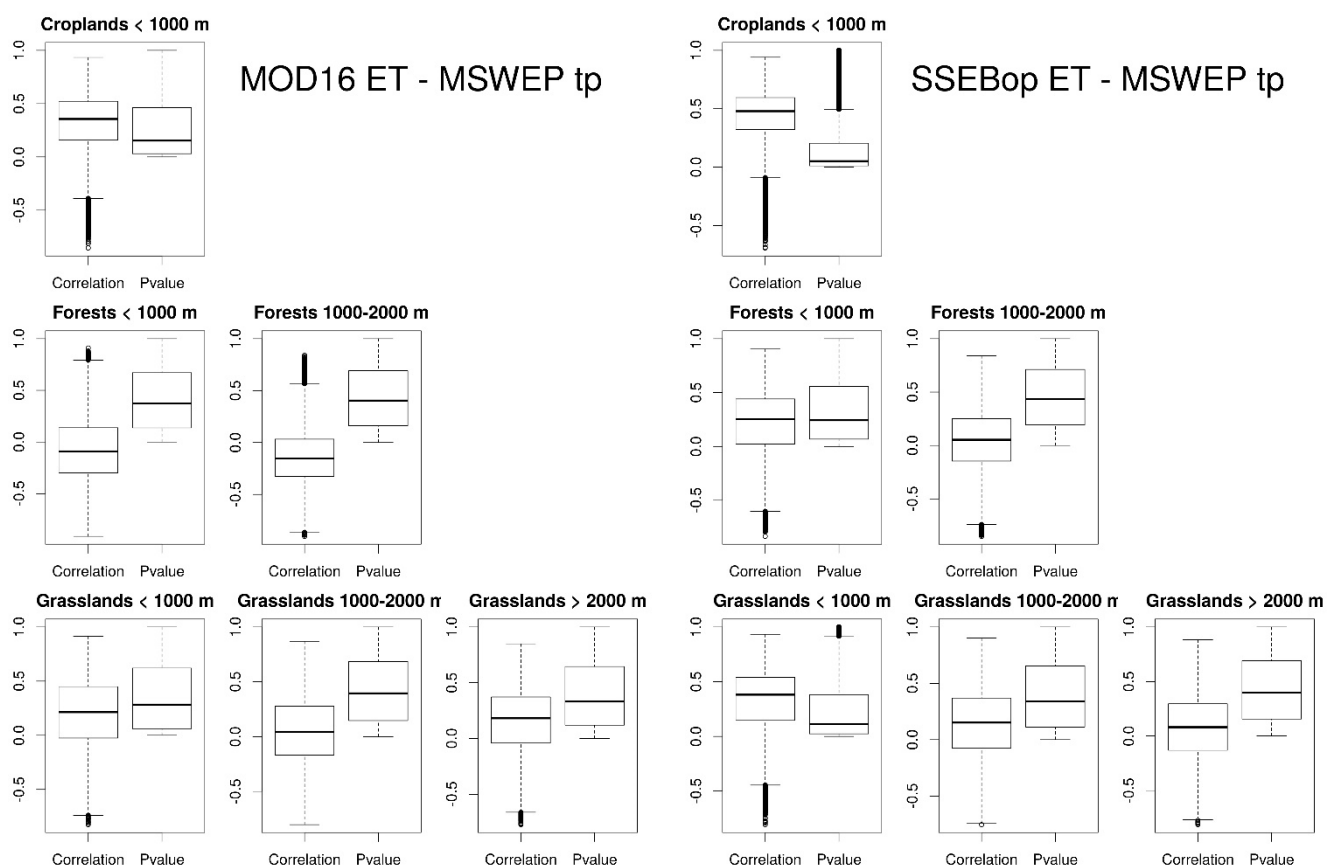

**Figure S24.** Distribution of the correlation and  $p$ -value between MOD16 and SSEBop ET and MSWEP precipitation. All the data were aggregated over the growing season and divided in combined classes of land cover and altitude.

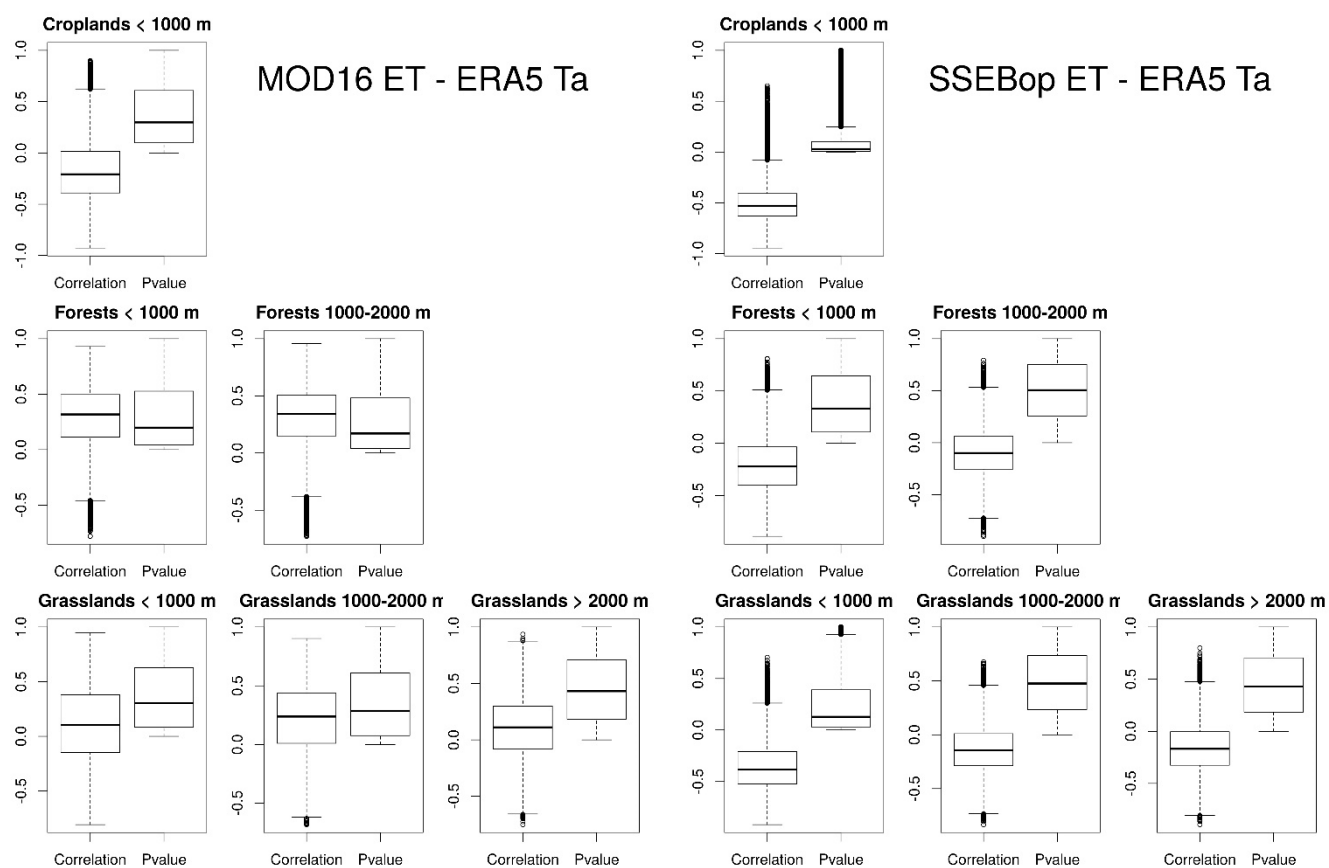

**Figure S25.** Distribution of the correlation and  $p$ -value between MOD16 and SSEBop ET and ERA5-Land air temperature. All the data were aggregated over the growing season and divided in combined classes of land cover and altitude.

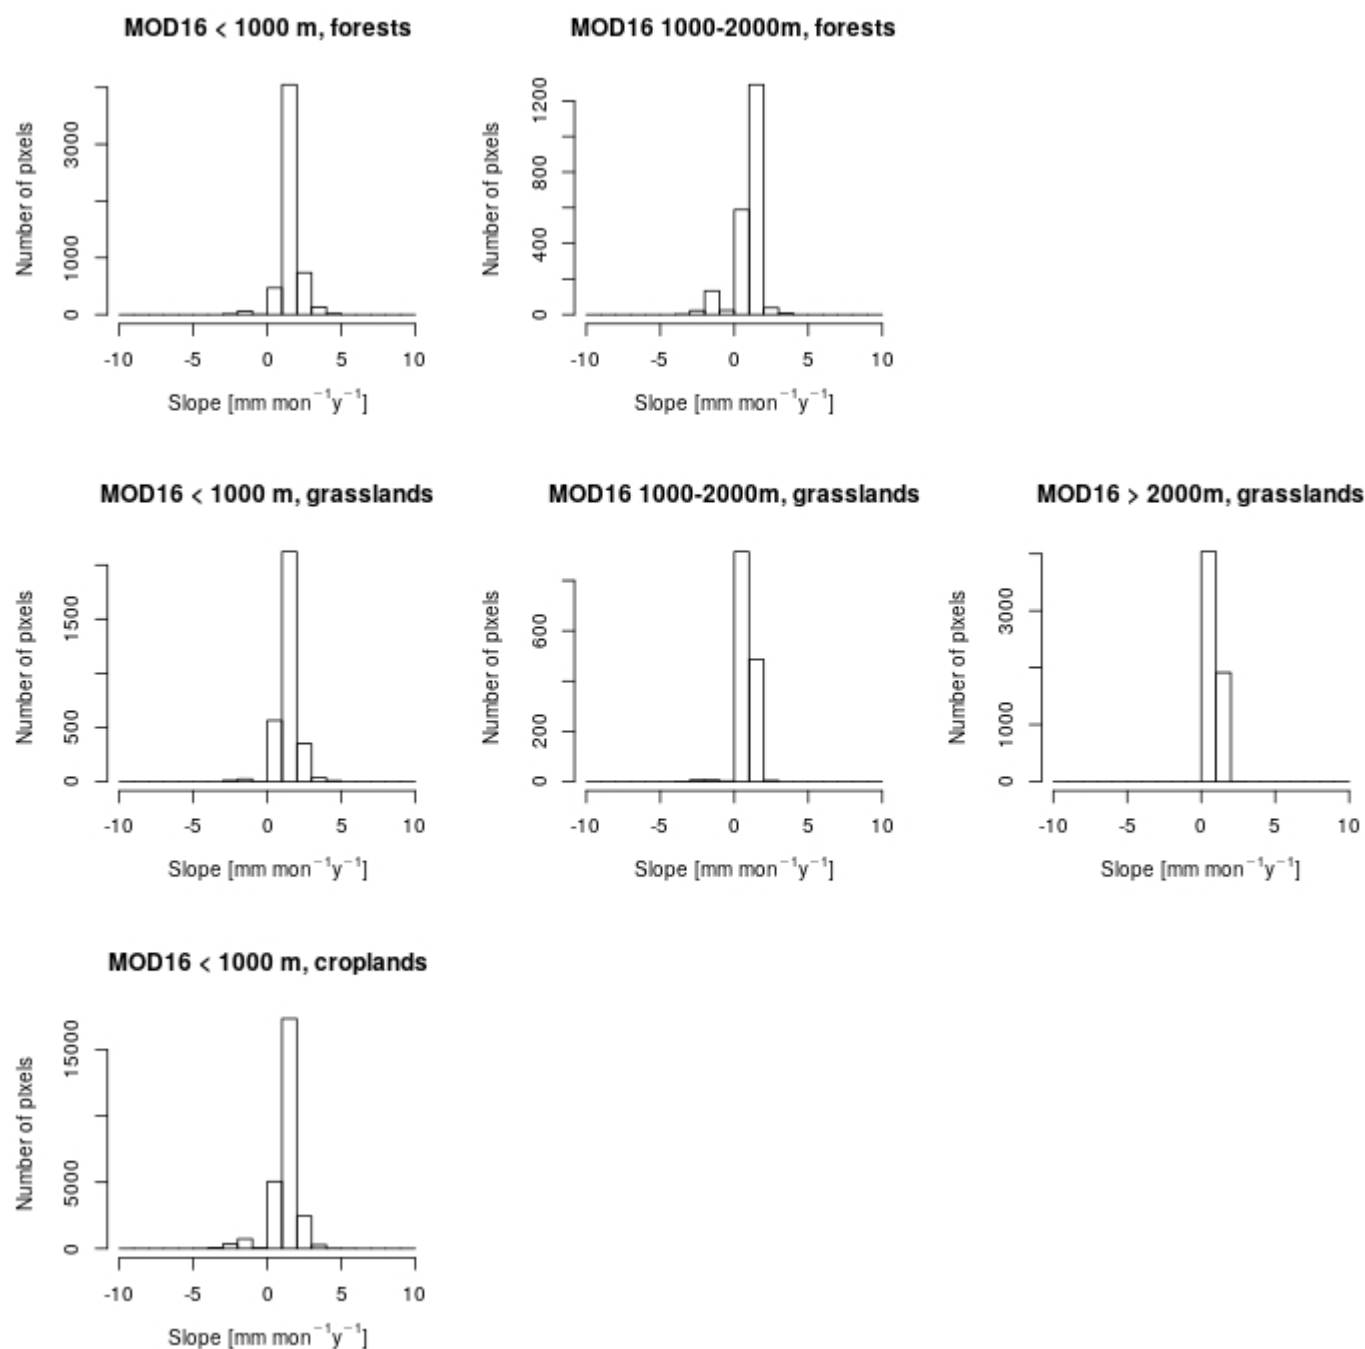

**Figure S26.** Distribution with elevation and land cover, in number of 500 m x 500 m pixels, of the Sen's slope of the trend of MOD16 monthly ET in May, at 5 % significance level.

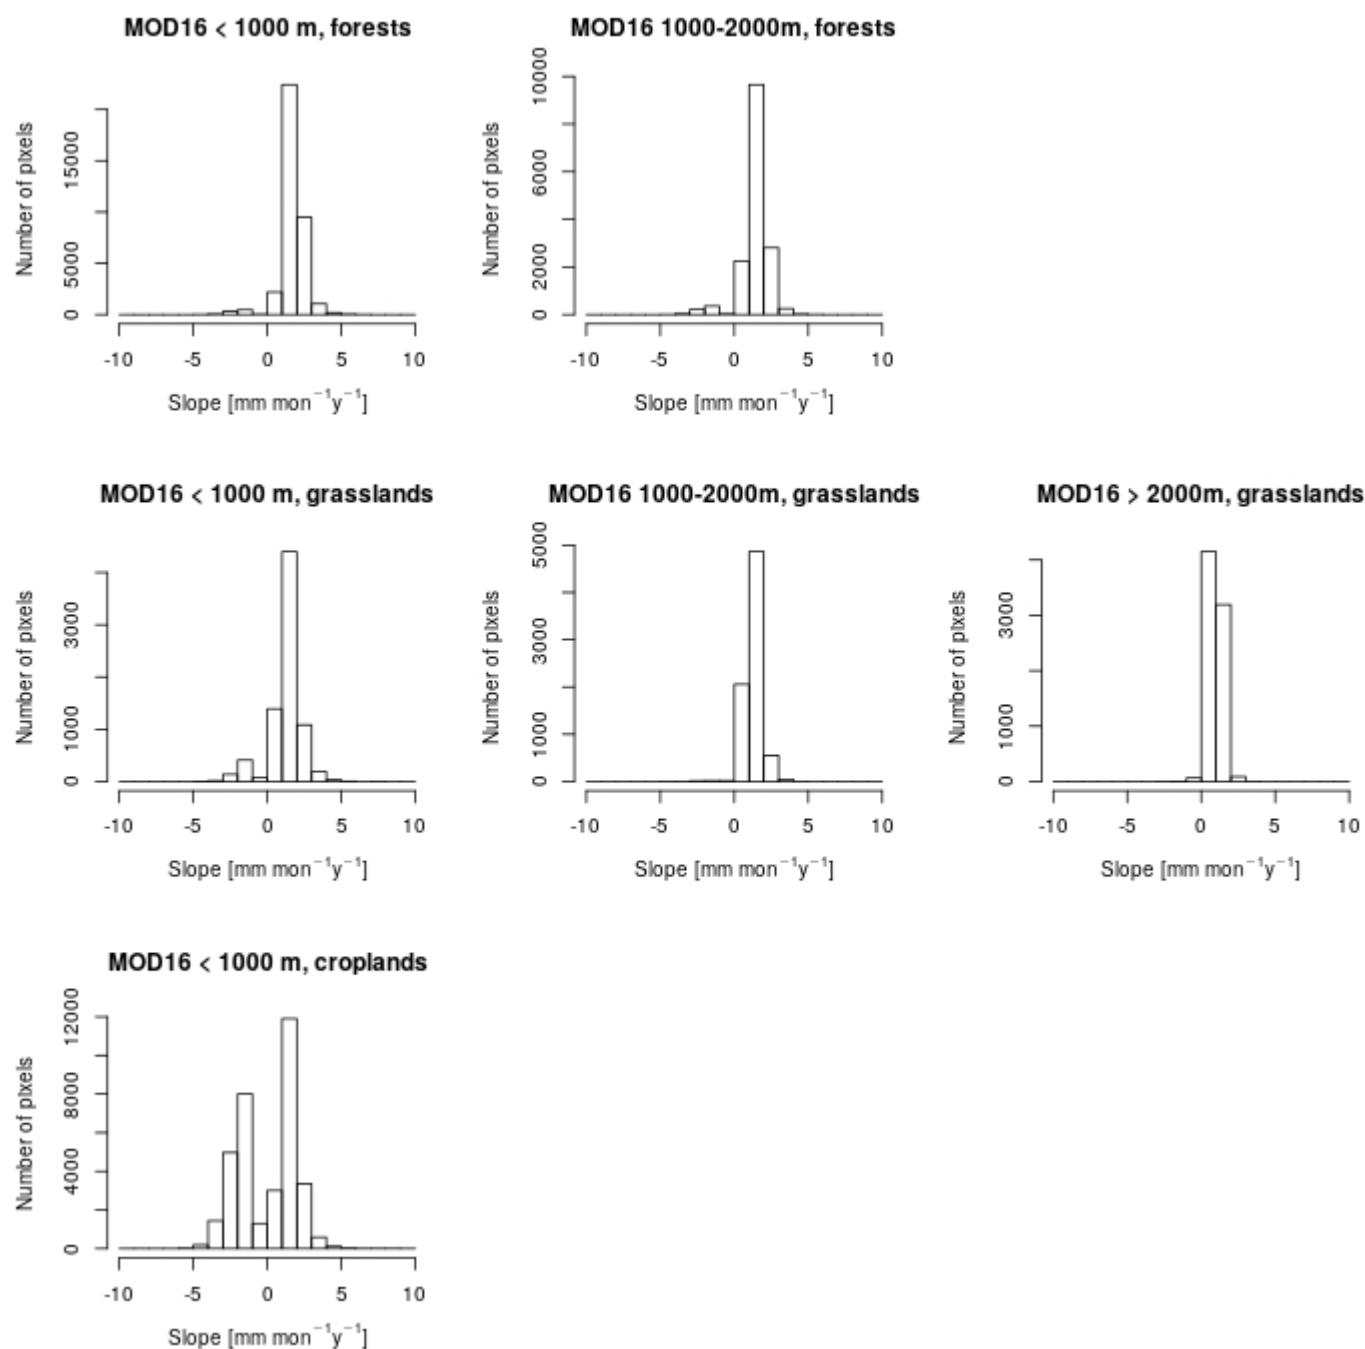

**Figure S27.** Distribution with elevation and land cover, in number of 500 m x 500 m pixels, of the Sen's slope of the trend of MOD16 monthly ET in June, at 5 % significance level.

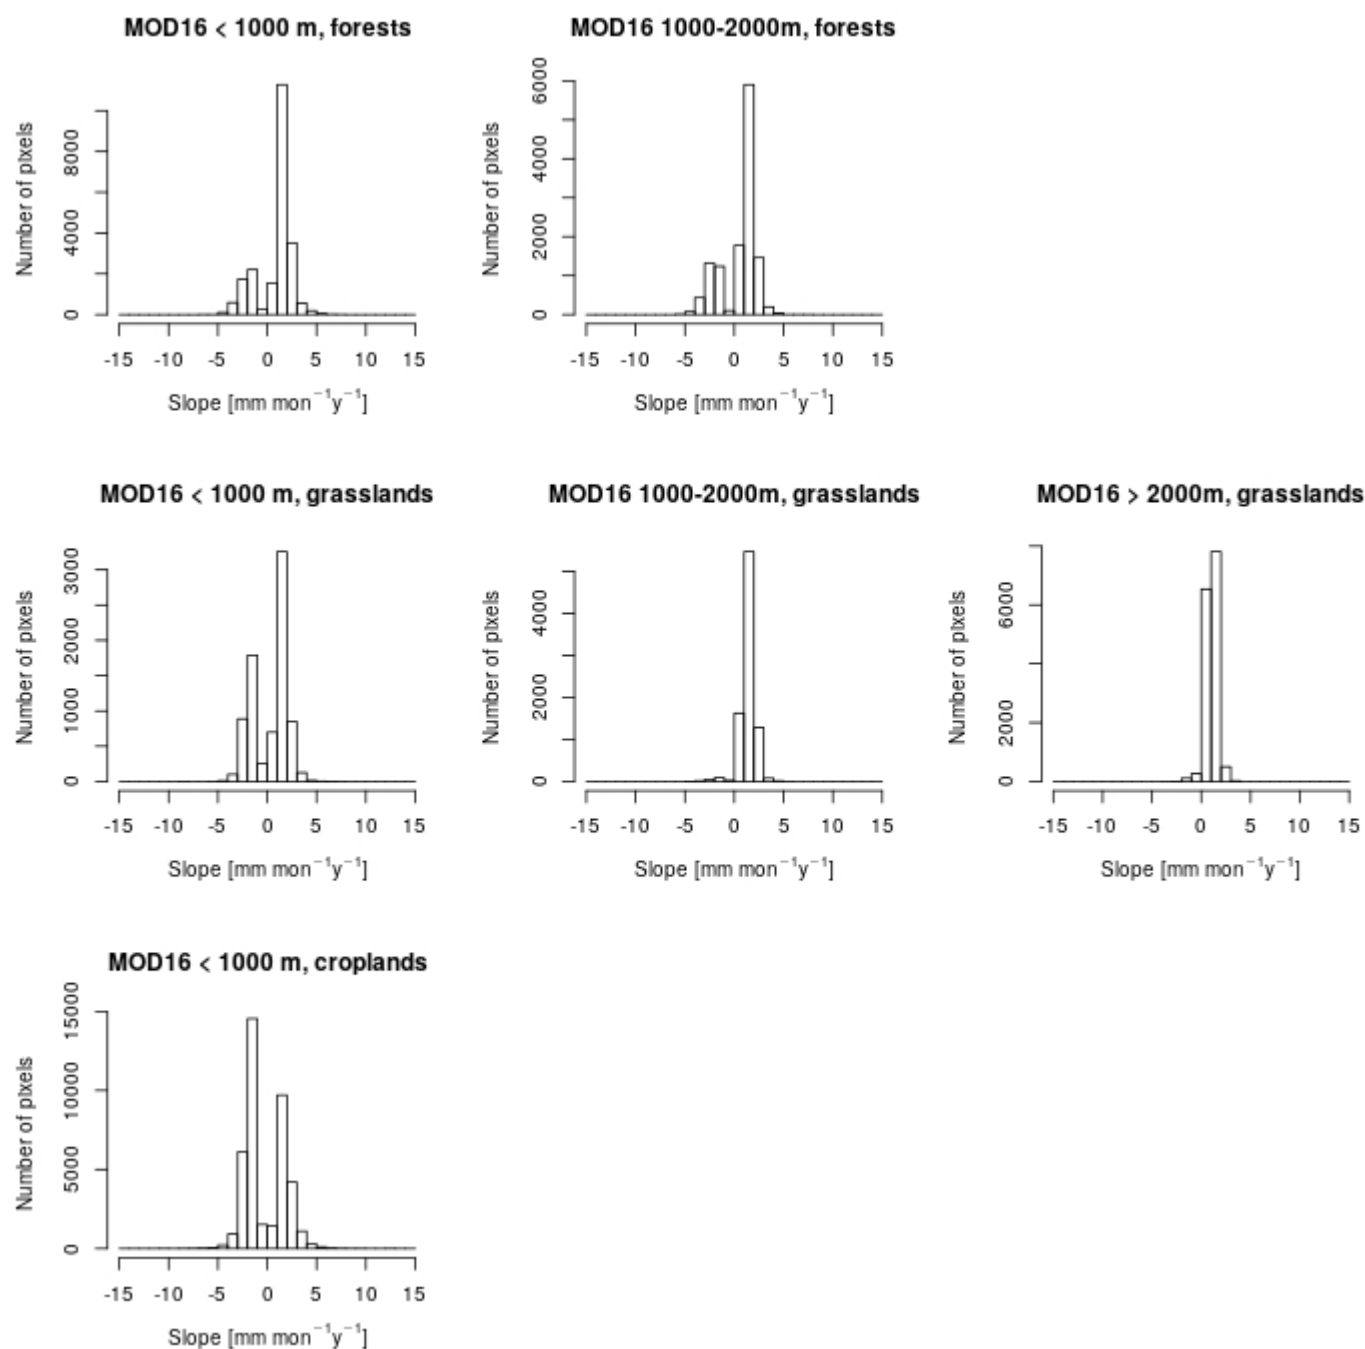

**Figure S28.** Distribution with elevation and land cover, in number of 500 m x 500 m pixels, of the Sen's slope of the trend of MOD16 monthly ET in July, at 5 % significance level.

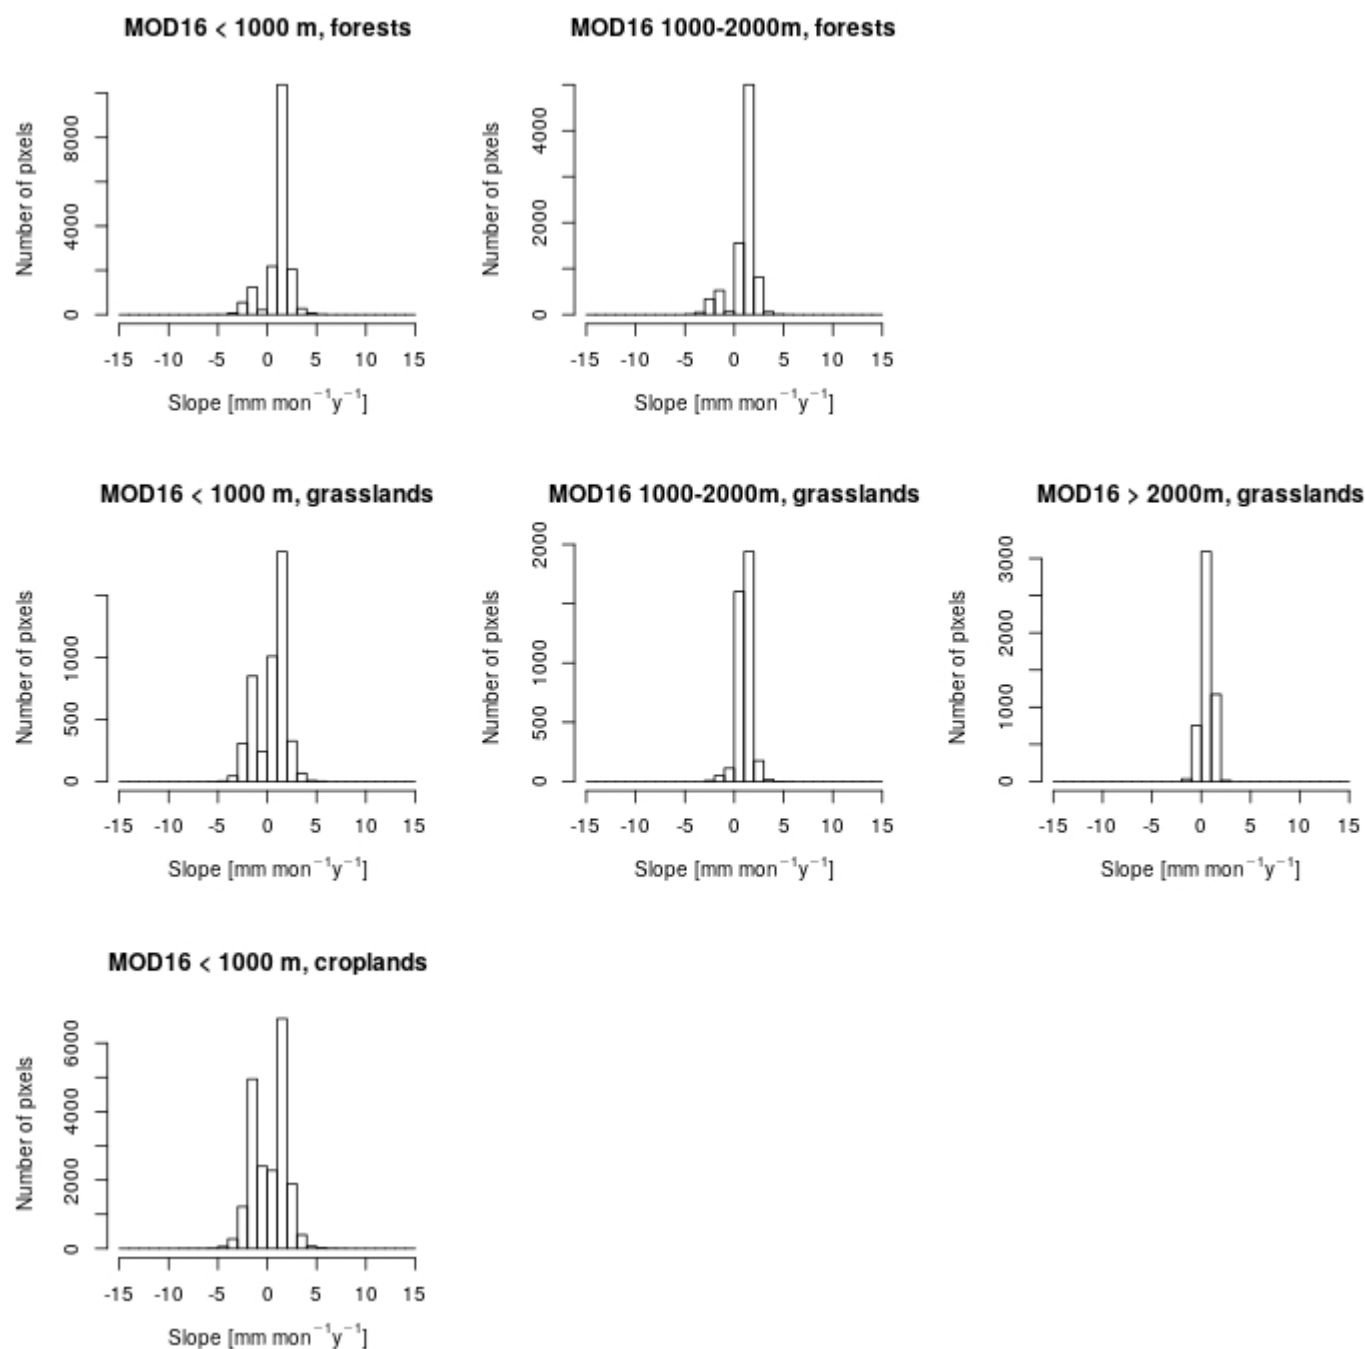

**Figure S29.** Distribution with elevation and land cover, in number of 500 m x 500 m pixels, of the Sen's slope of the trend of MOD16 monthly ET in August, at 5 % significance level.

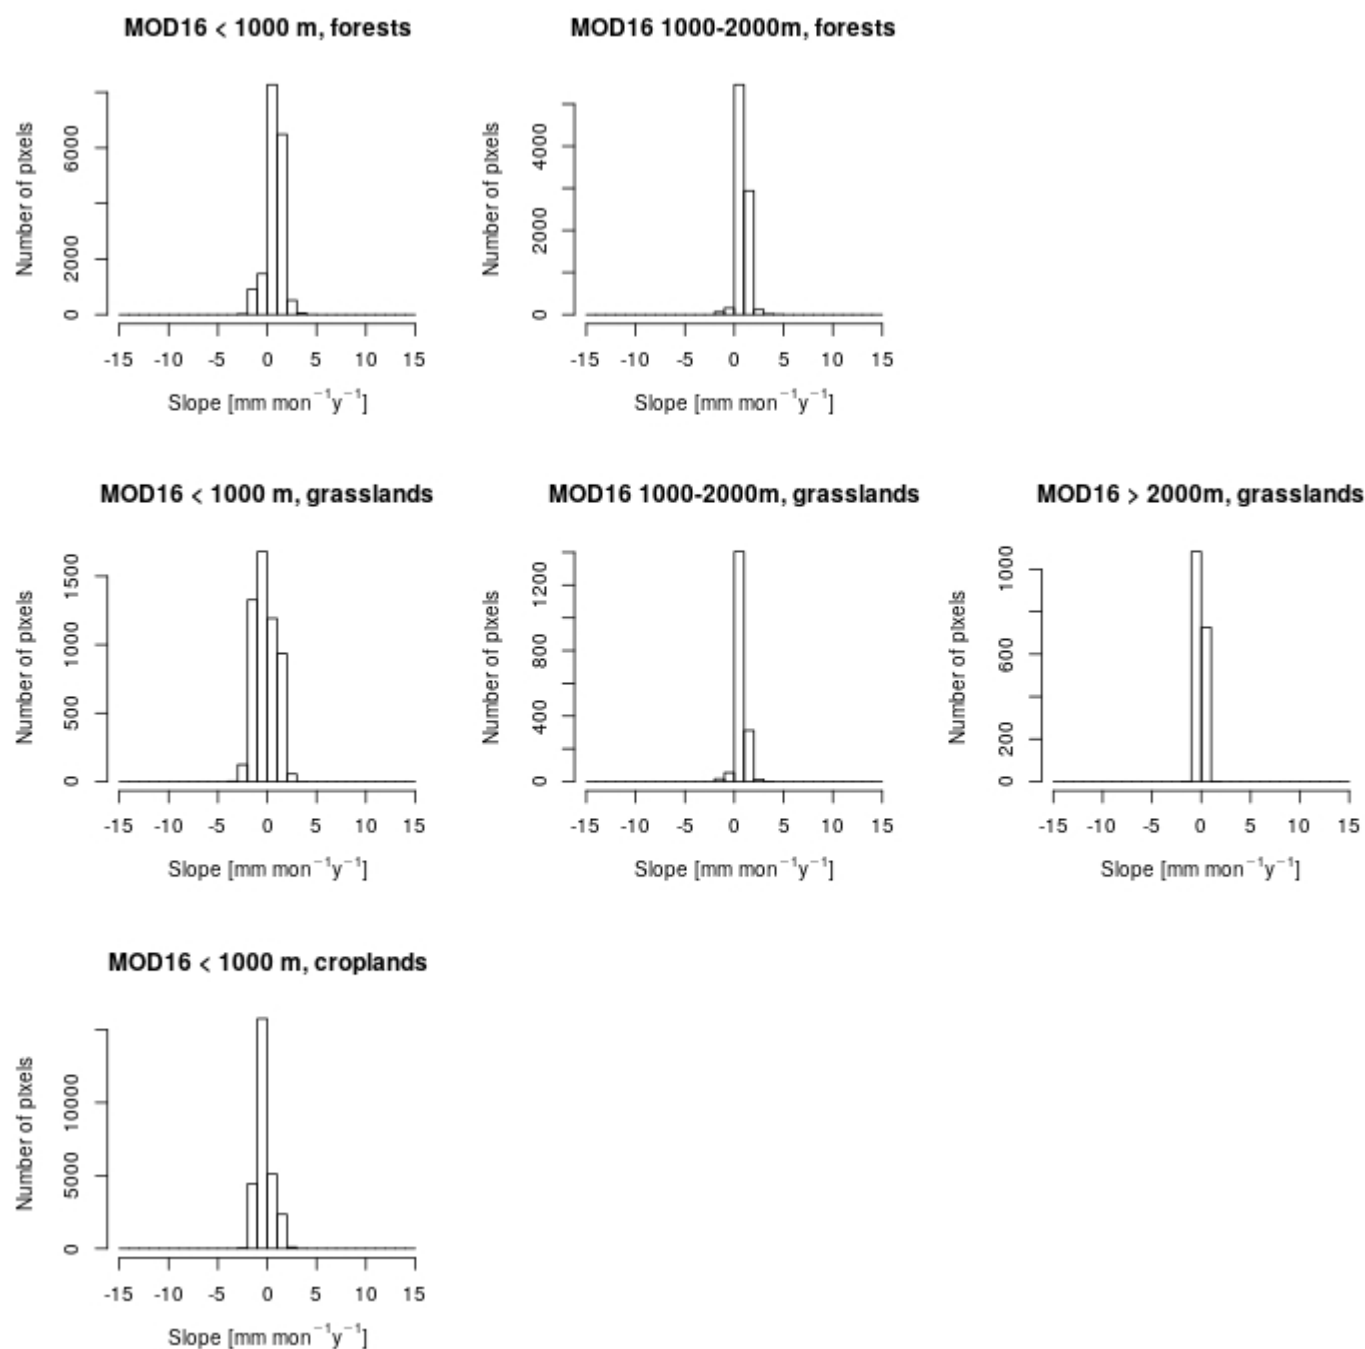

**Figure S30.** Distribution with elevation and land cover, in number of 500 m x 500 m pixels, of the Sen's slope of the trend of MOD16 monthly ET in September, at 5 % significance level.

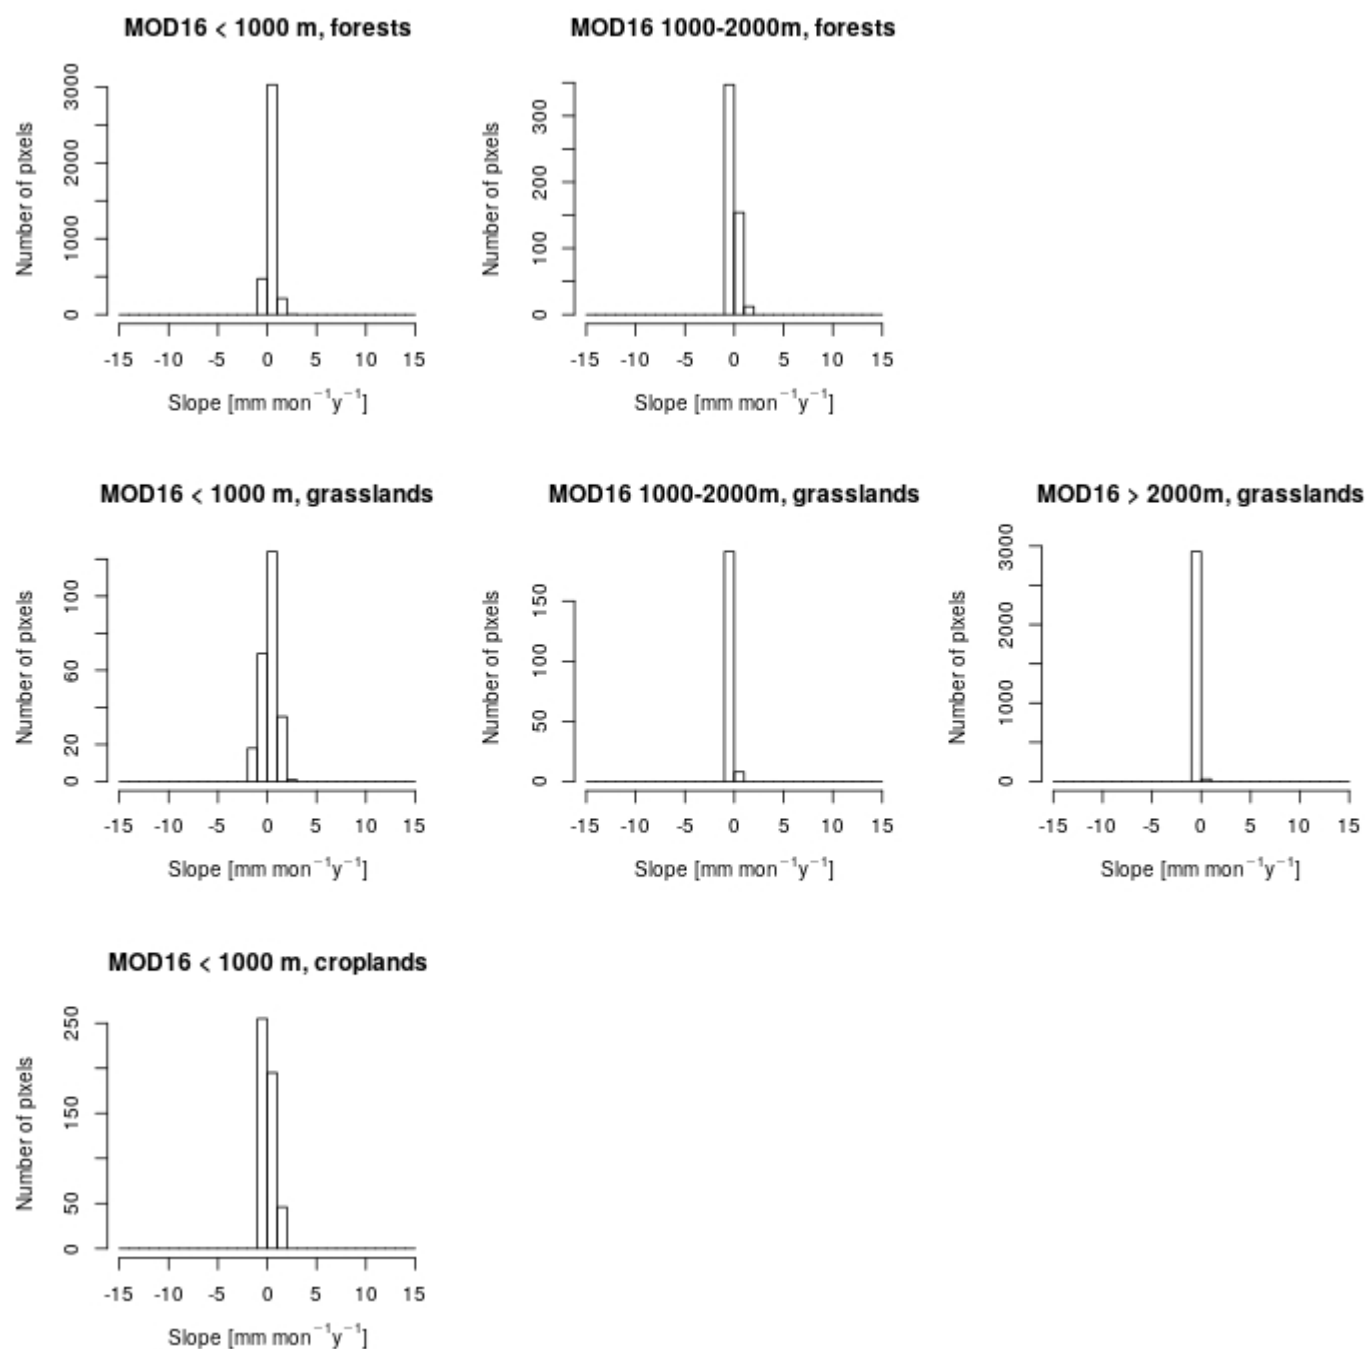

**Figure S31.** Distribution with elevation and land cover, in number of 500 m x 500 m pixels, of the Sen's slope of the trend of MOD16 monthly ET in October, at 5 % significance level.

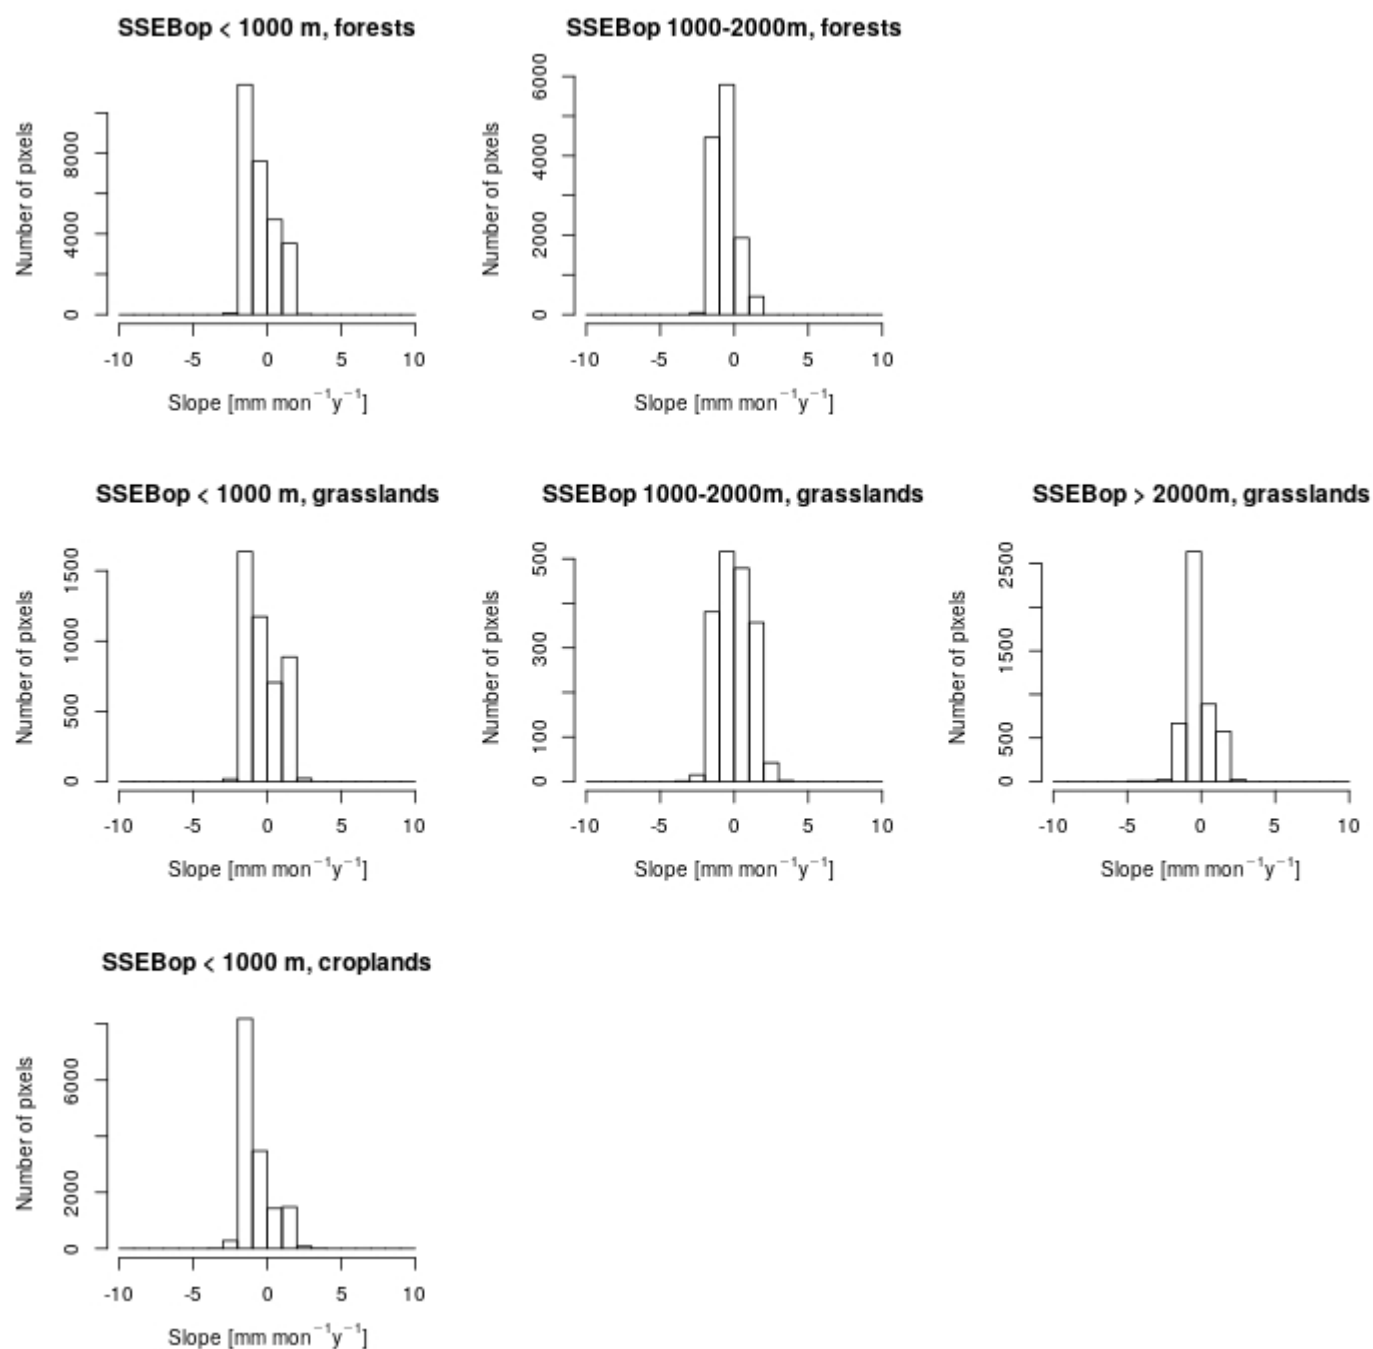

**Figure S32.** Distribution with elevation and land cover, in number of 500 m x 500 m pixels, of the Sen's slope of the trend of SSEBop monthly ET in April, at 5 % significance level.

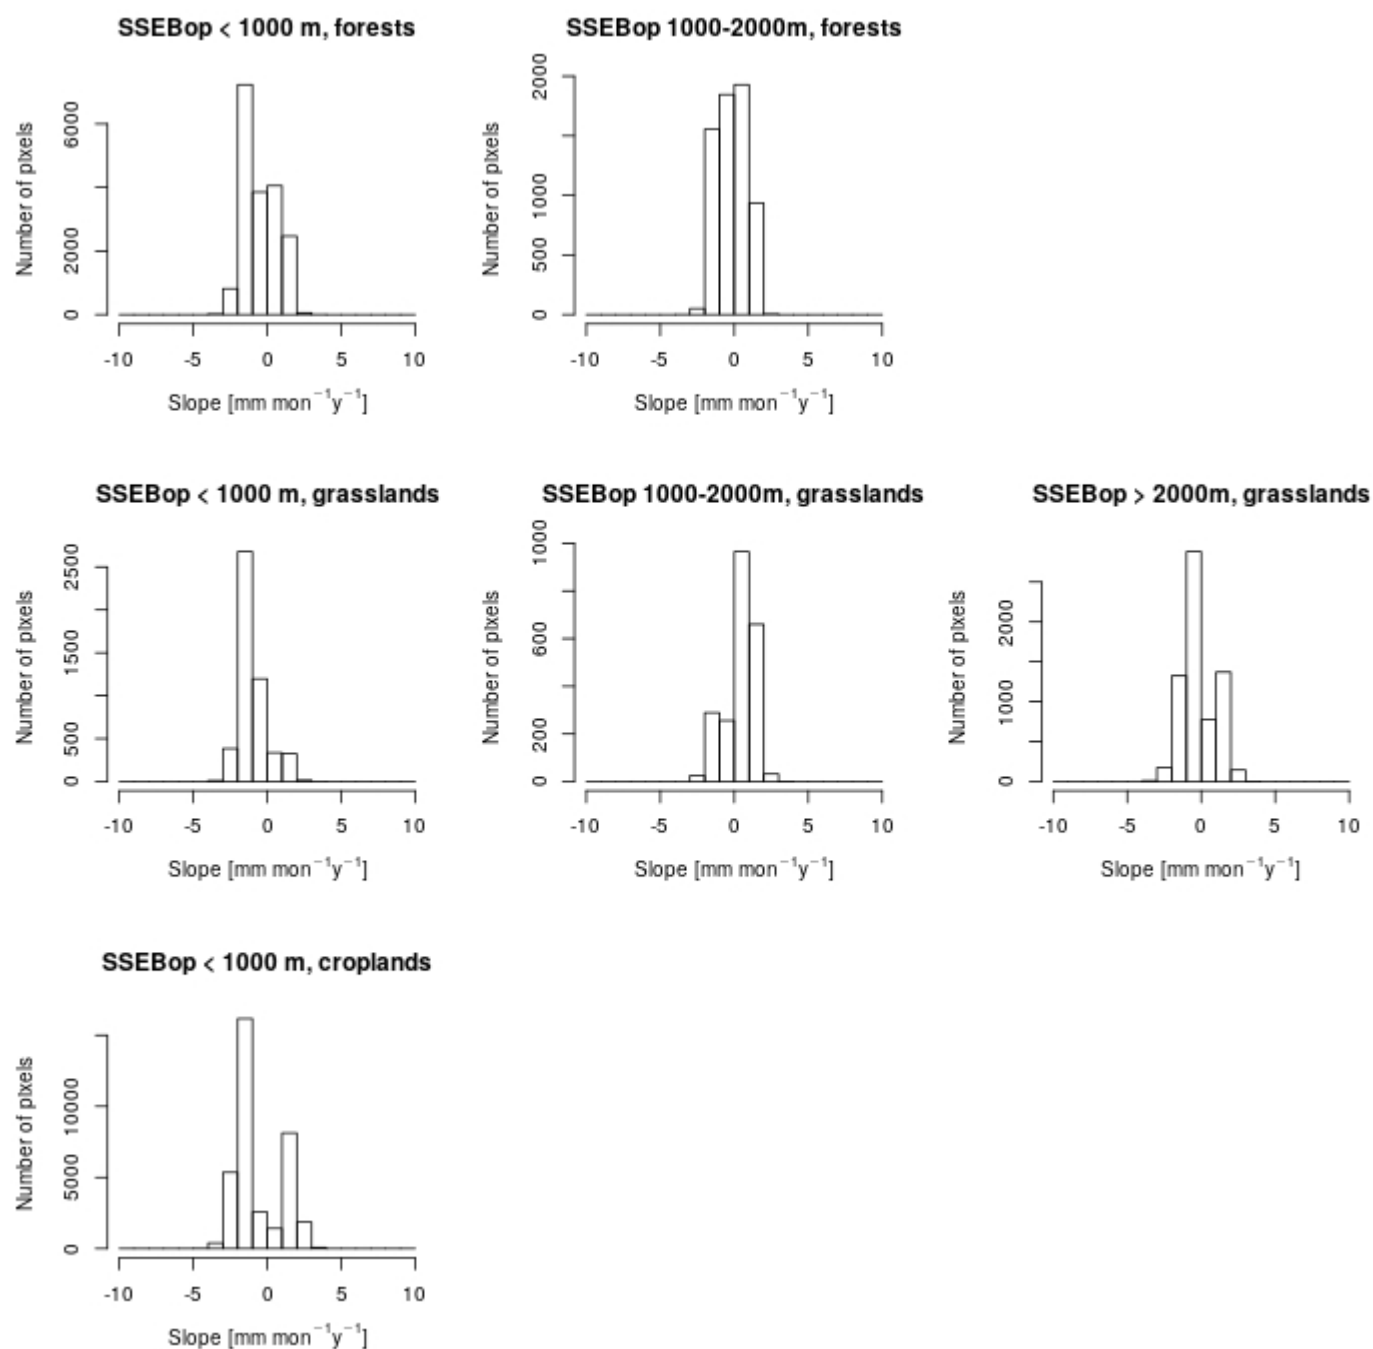

**Figure S33.** Distribution with elevation and land cover, in number of 500 m x 500 m pixels, of the Sen's slope of the trend of SSEBop monthly ET in May, at 5 % significance level.

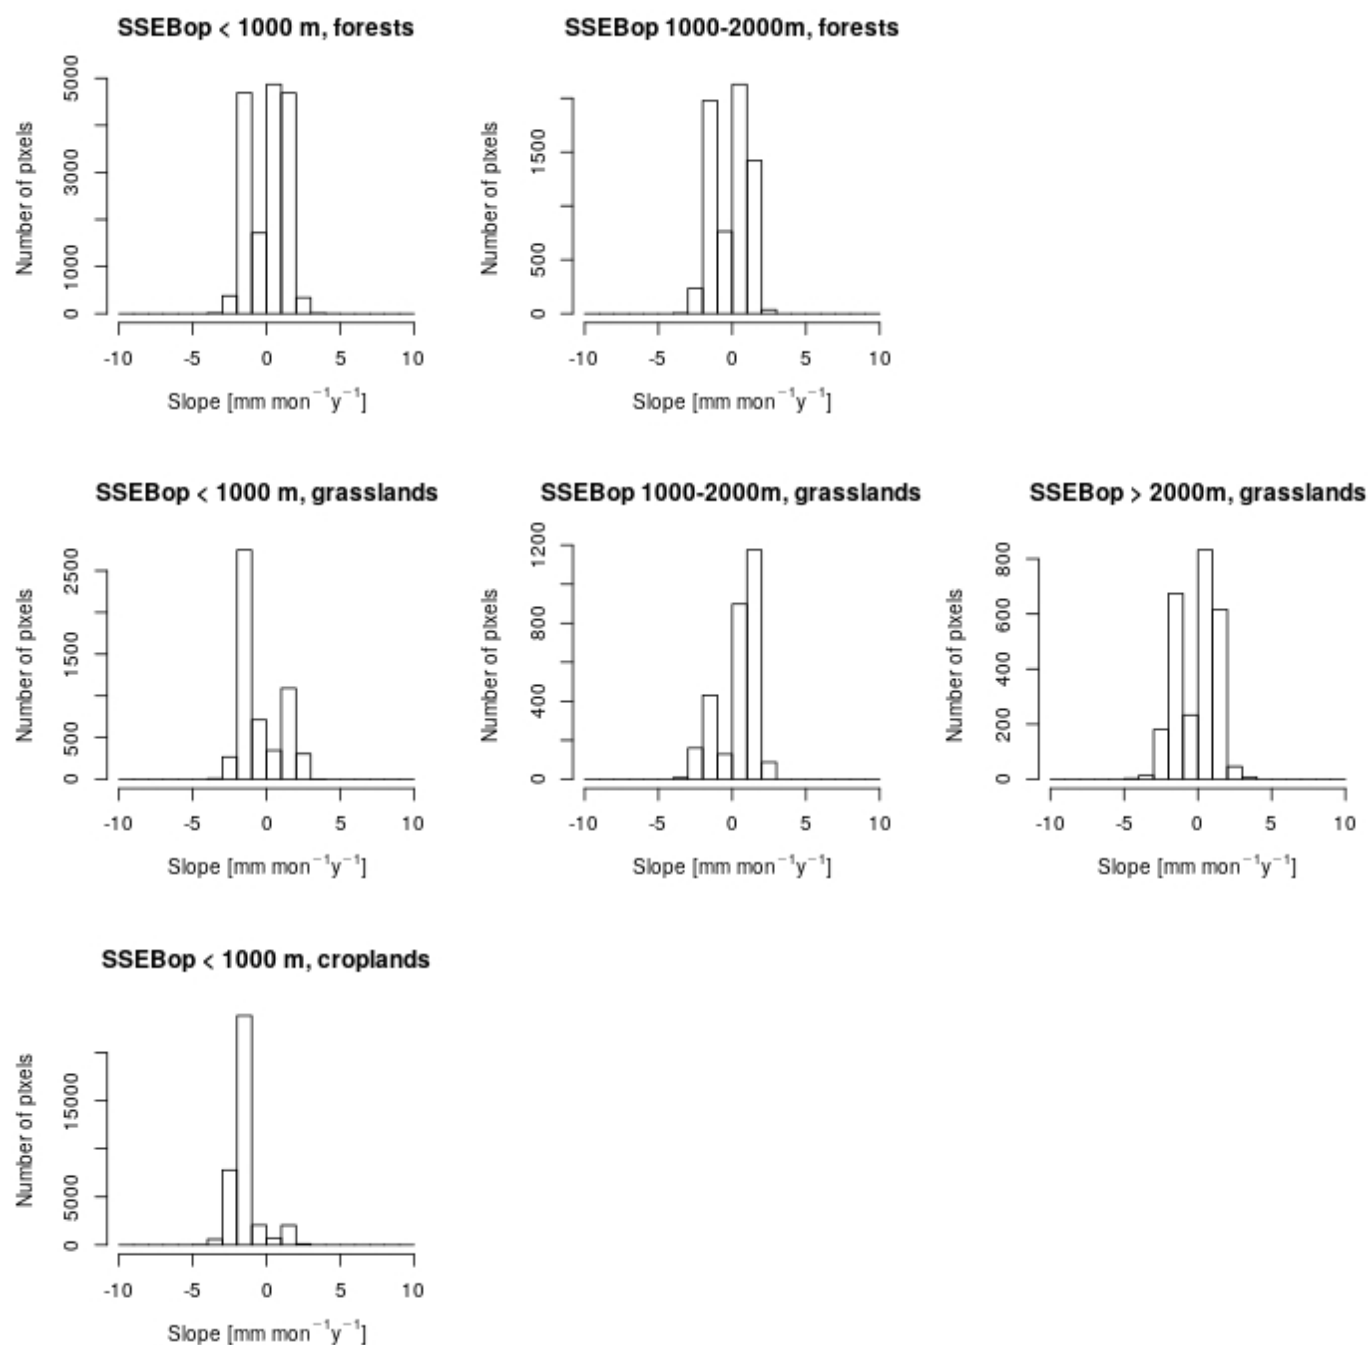

**Figure S34.** Distribution with elevation and land cover, in number of 500 m x 500 m pixels, of the Sen's slope of the trend of SSEBop monthly ET in June, at 5 % significance level.

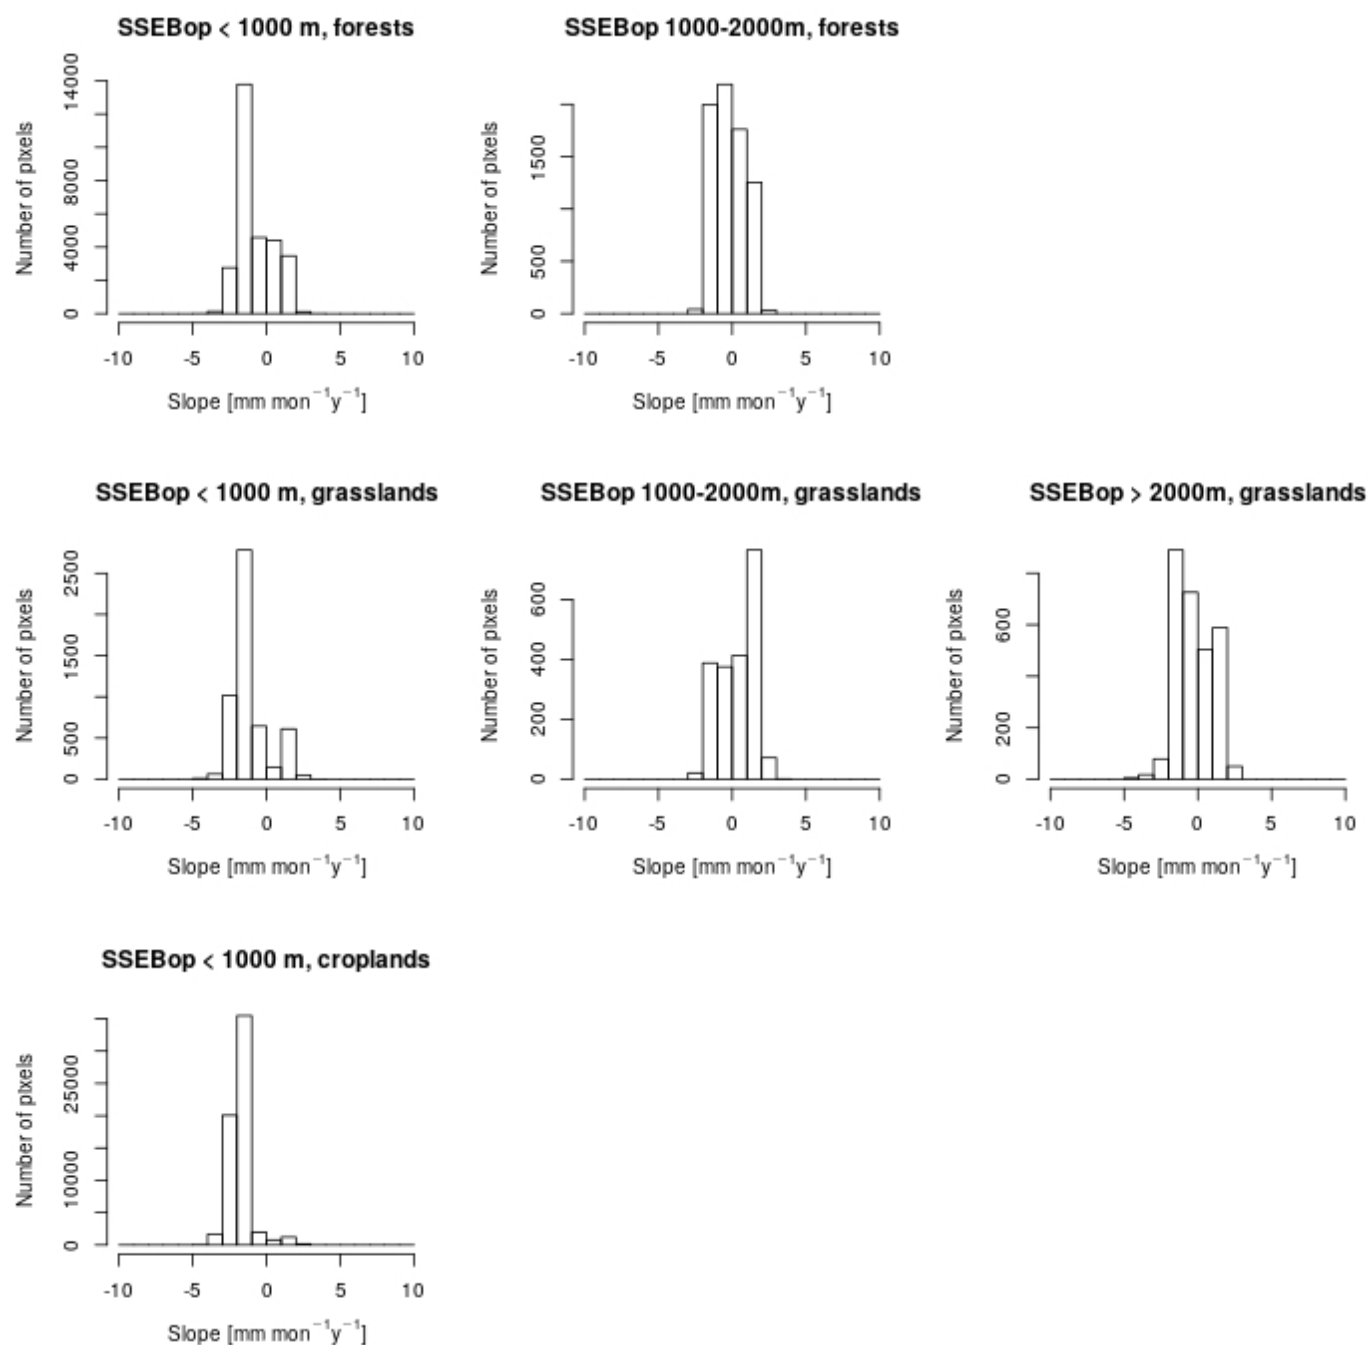

**Figure S35.** Distribution with elevation and land cover, in number of 500 m x 500 m pixels, of the Sen's slope of the trend of SSEBop monthly ET in July, at 5 % significance level.

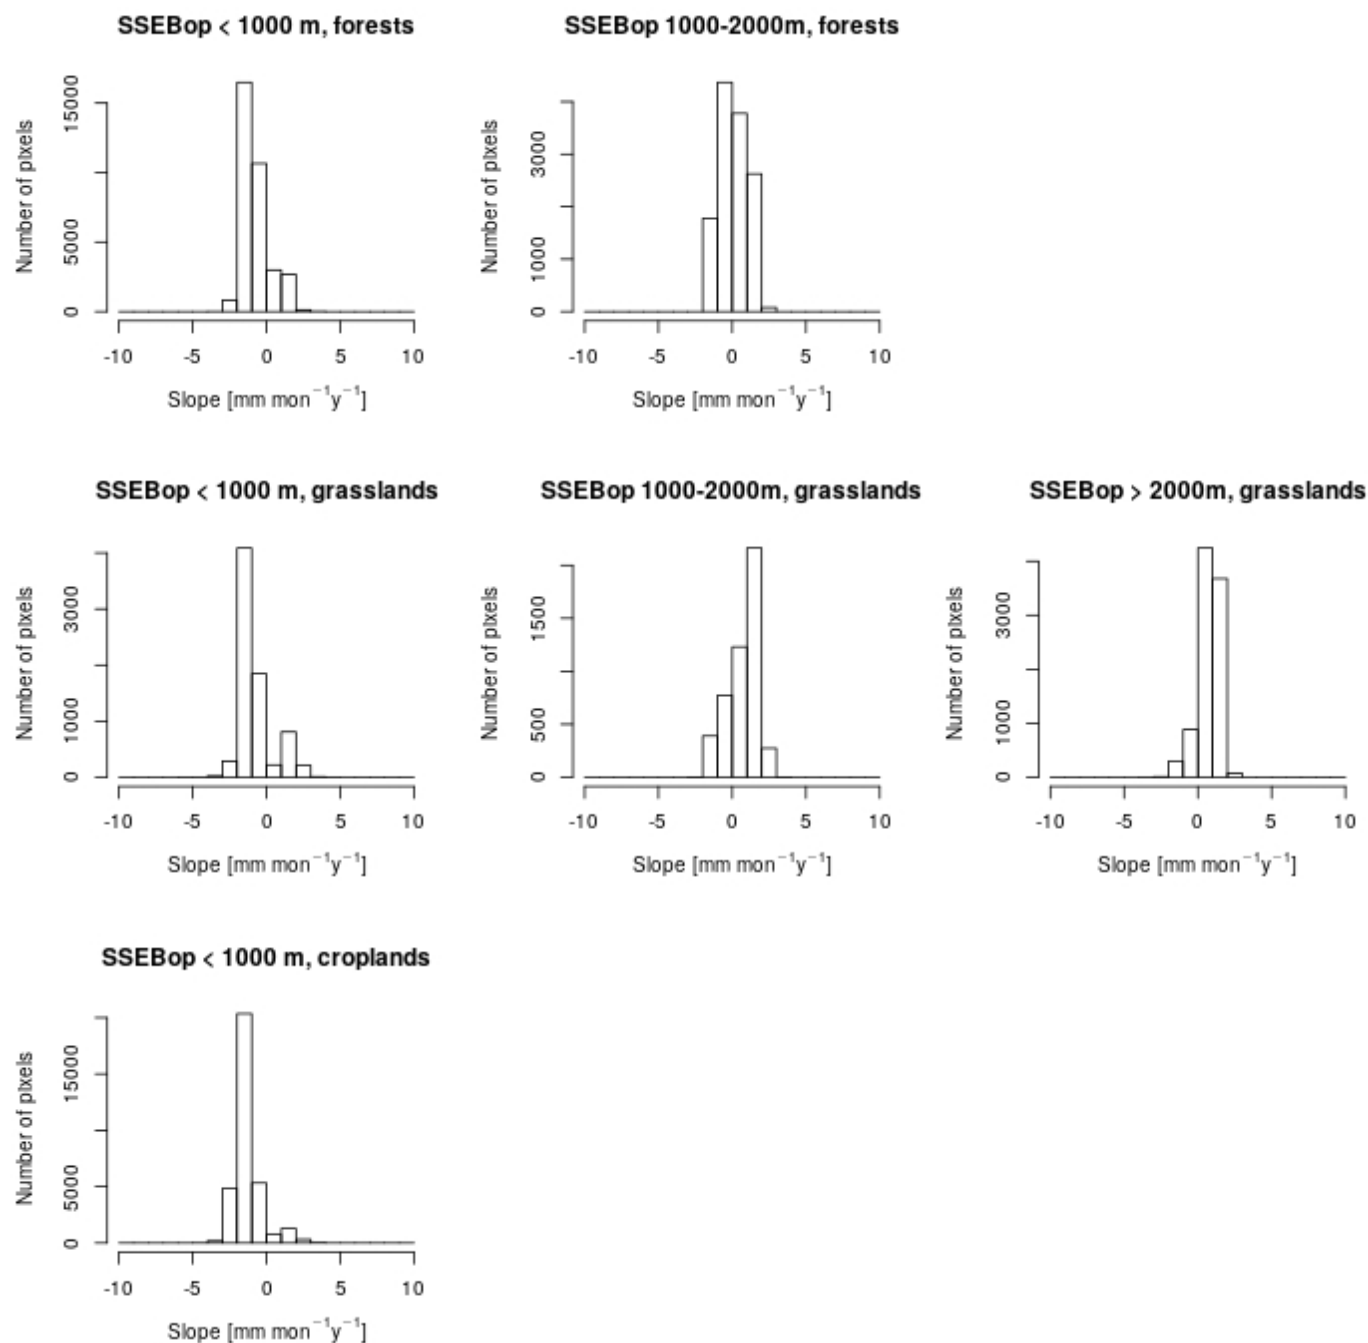

**Figure S36.** Distribution with elevation and land cover, in number of 500 m x 500 m pixels, of the Sen's slope of the trend of SSEBop monthly ET in August, at 5 % significance level.

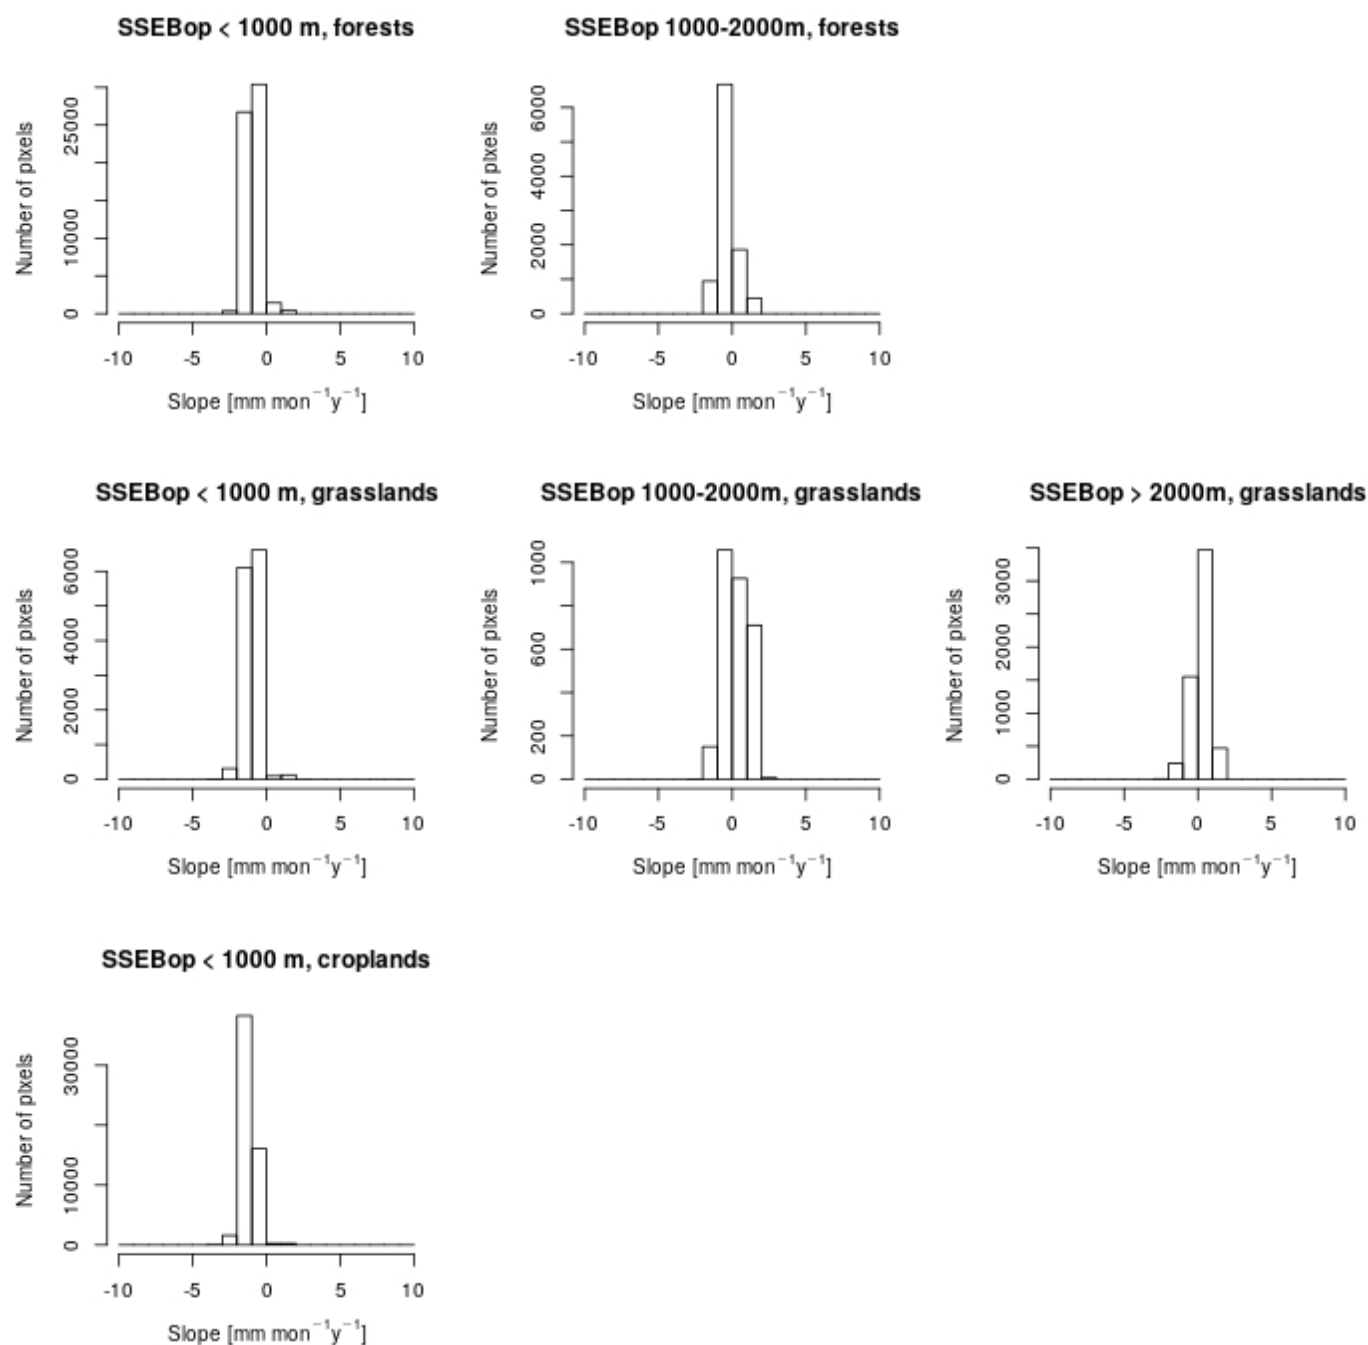

**Figure S37.** Distribution with elevation and land cover, in number of 500 m x 500 m pixels, of the Sen's slope of the trend of SSEBop monthly ET in September, at 5 % significance level.

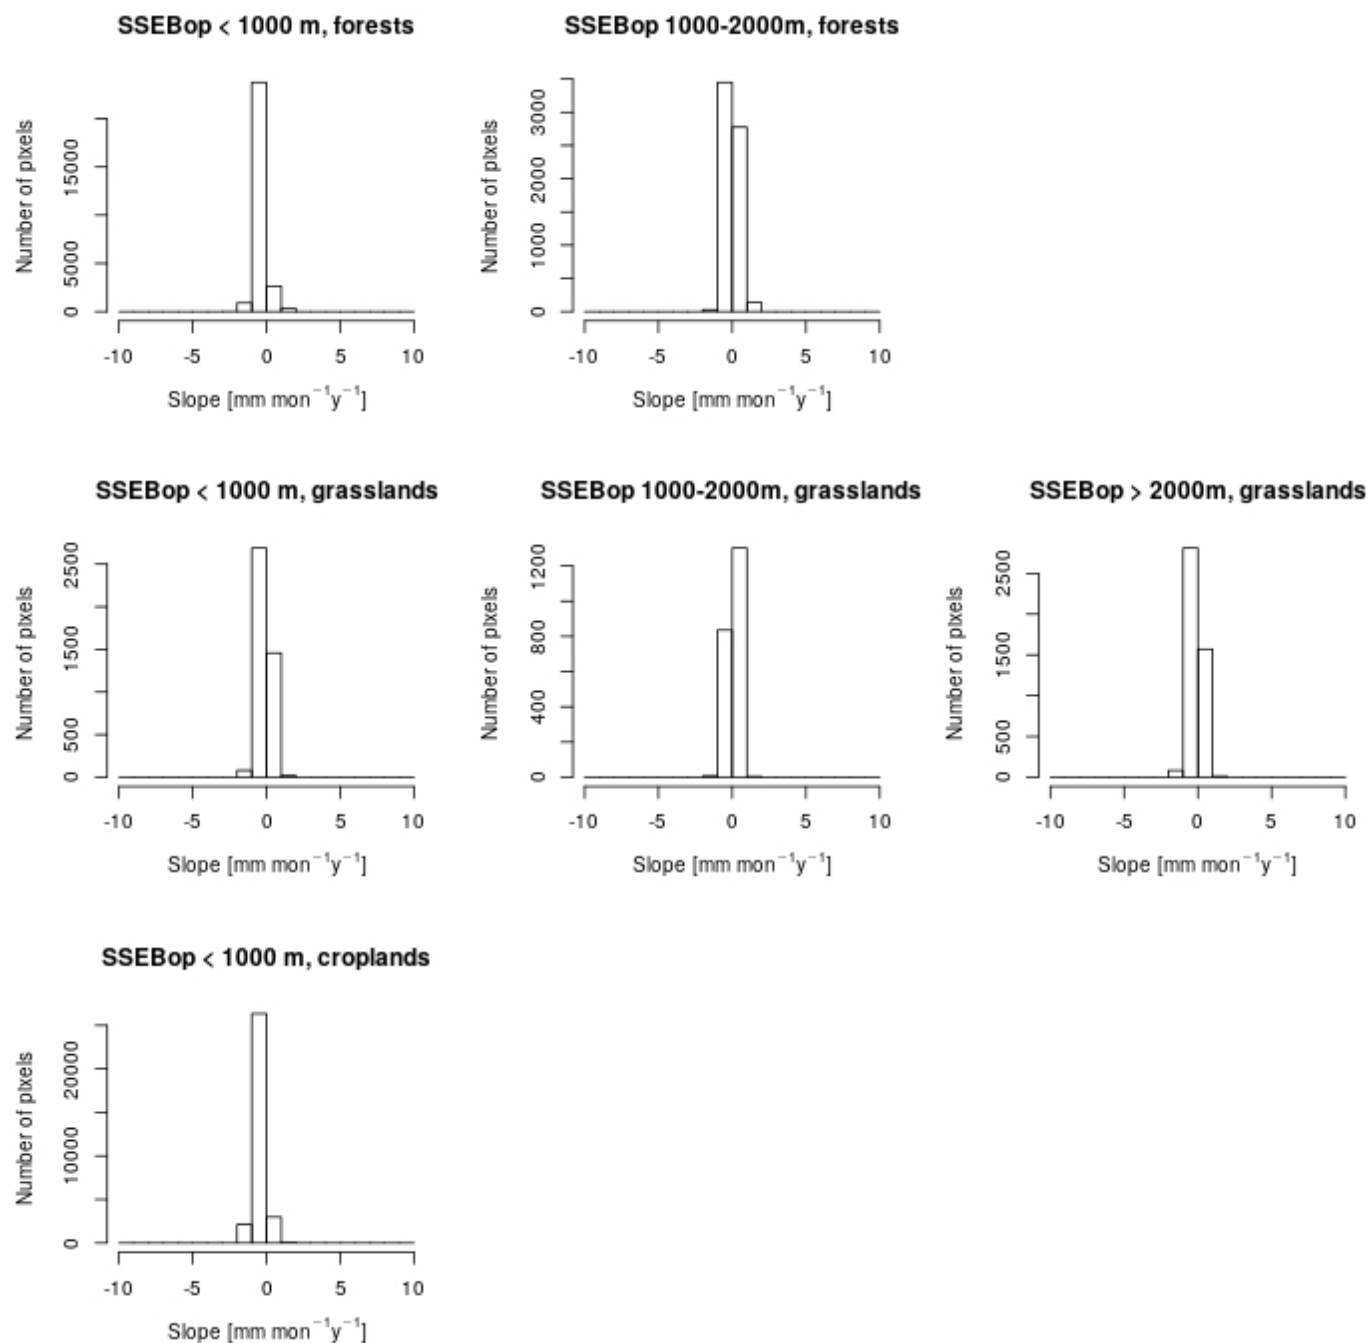

**Figure S38.** Distribution with elevation and land cover, in number of 500 m x 500 m pixels, of the Sen's slope of the trend of SSEBop monthly ET in October, at 5 % significance level.

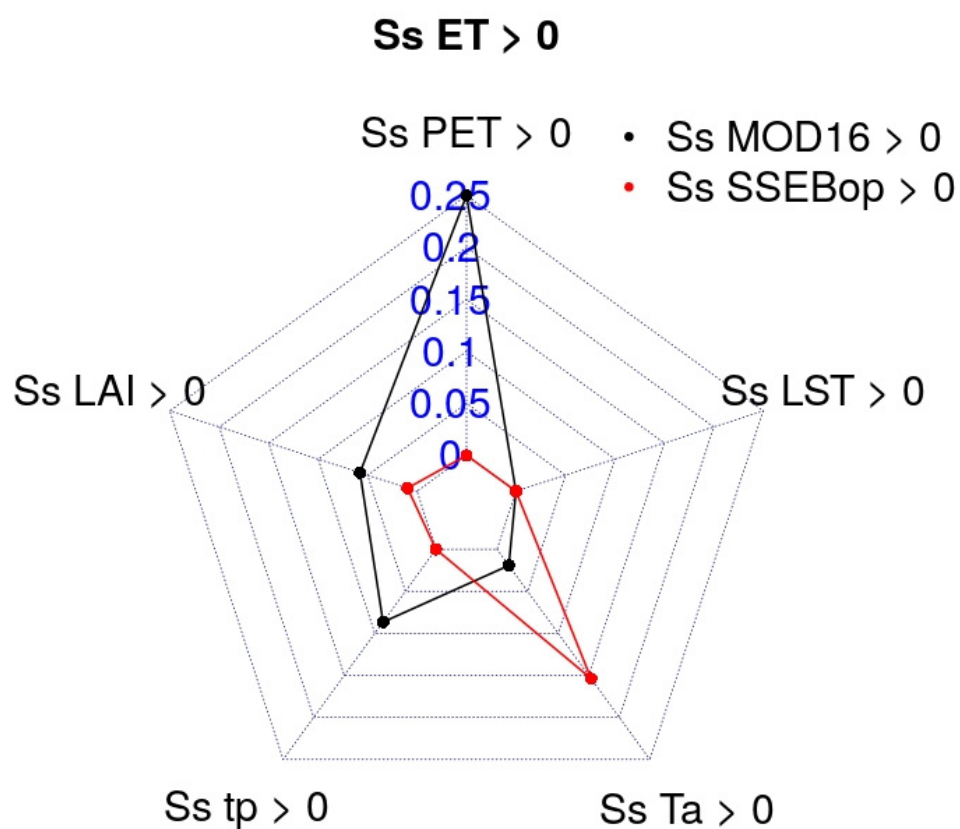

**Figure S39.** Correlation between positive yearly ET trends and trends in PET, LAI,  $tp$ ,  $Ta$  and LST.

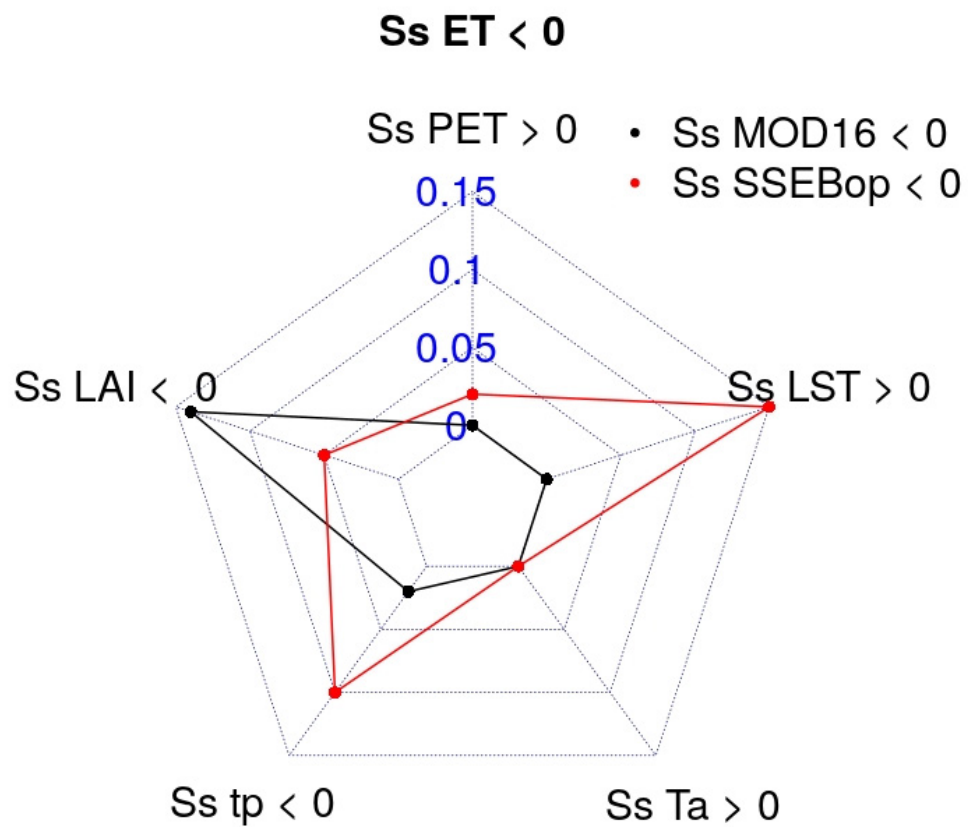

**Figure S40.** Correlation between negative yearly ET trends and trends in PET, LAI, *tp*, *Ta* and LST.
