# Supplementary material
Source: MDPI journal article supplement (https://www.mdpi.com/2072-4292/13/21/4316)
Supplement: s1 [file s1 › Stations.html]

leaflet
